# Supplementary material for: Selective phosphanyl complex trapping using TEMPO. Synthesis and reactivity of P-functional P-nitroxyl phosphane complexes
Source: Royal Society of Chemistry journal article supplement (doi:10.1039/c4cc06084a), 2014-01-01
Supplement: c4cc06084a1.pdf [file c4cc06084a1.pdf]

## Selective Phosphanyl Complex Trapping using TEMPO. Synthesis and reactivity of *P*-Functional *P*-Nitroxyl Phosphane Complexes

Vitaly Nesterov,<sup>a</sup> Zheng-Wang Qu,<sup>b</sup> Gregor Schnakenburg,<sup>a</sup> Stefan Grimme,<sup>\*b</sup> and Rainer Streibel\*<sup>a</sup>

<sup>a</sup> *Institut für Anorganische Chemie der Rheinischen Friedrich-Wilhelms-Universität Bonn, Gerhard-Domagk-Str.1, 53121 Bonn, Germany. Fax: +49 22873 9616; Tel: +49 22873 5345; E-mail: [r.streibel@uni-bonn.de](mailto:r.streibel@uni-bonn.de)*

<sup>b</sup> *Mulliken Center for Theoretical Chemistry, Institut für Physikalische und Theoretische Chemie, Rheinische Friedrich-Wilhelms-Universität Bonn, Berlingstr. 4, 53115 Bonn, Germany. E-mail: [grimme@thch.uni-bonn.de](mailto:grimme@thch.uni-bonn.de)*

### Supporting Information

|                                                |        |
|------------------------------------------------|--------|
| A. General information                         | Page 2 |
| B. Experimental procedures and analytical data | Page 2 |
| C. Computational Details                       | Page 5 |

## A. General information

All manipulations involving air- and moisture sensitive compounds were carried out under an atmosphere of purified argon by using standard Schlenk-line techniques or in a glove-box. Solvents were dried with appropriate drying agents and degassed before use. The  $^1\text{H}$ ,  $^{13}\text{C}\{^1\text{H}\}$ , and  $^{31}\text{P}\{^1\text{H}\}$  NMR spectroscopic data were recorded on a Bruker DMX 300 spectrometer. Mass spectra were recorded on a MAT 95 XL Thermo Finnigan spectrometer (selected data given). Infrared spectra were recorded on a Thermo Nicolet 380 FT-IR spectrometer (selected data given).

## B. Experimental procedures and analytical data

### One-electron oxidation with $[\text{Ph}_3\text{C}]\text{BF}_4$ in the presence of TEMPO.

**Complex  $(\text{CO})_5\text{W}\{(\text{Me}_3\text{Si})_2\text{HCP}(\text{F})\text{TEMPO}\}$  (3a).** To a stirred solution of phosphane complex **1** (534.2 mg, 1 mmol) and 12-crown-4 (0.175 mL, 1.12 mmol) in 18 mL of THF at  $-78^\circ\text{C}$  was slowly added solution of *n*-BuLi (1.6 M, 0.7 mL, 1.12 mmol). After 15 min the mixture was cooled down up to  $-90^\circ\text{C}$  and a mixture of triphenylcarbenium tetrafluoroborate (380 mg, 1.15 mmol) and TEMPO (781 mg, 5 mmol) was added under argon atmosphere as a solid. Stirred reaction mixture was slowly warmed up to  $-30^\circ\text{C}$  in a cooling bath (ca. 2.5 h). Volatiles were removed under reduced pressure (0.02 mbar). Crude product was extracted with *n*-pentane (ca.  $-20^\circ\text{C}$ ) and subjected to column chromatography ( $\text{Al}_2\text{O}_3$ ,  $-20^\circ\text{C}$ , petrol ether). After evaporation of the solvent, the residue was kept at  $22^\circ\text{C}/1.1 \times 10^{-5}$  mbar for 1 h to afford the product as a white solid. Yield: 475.1 mg (0.689 mmol, 68.9 %), m.p.  $68^\circ\text{C}$  (dec.).  $^1\text{H}$  NMR (300.13 MHz,  $\text{CDCl}_3$ ,  $25^\circ\text{C}$ ):  $\delta$  = 0.30 (s, 9H,  $\text{Si}(\text{CH}_3)_3$ ), 0.32 (s, 9H,  $\text{Si}(\text{CH}_3)_3$ ), 1.20 (s, 6H,  $2\text{CH}_3$ ), 1.33 (s, 3H,  $\text{CH}_3$ ), 1.37 (s, 3H,  $\text{CH}_3$ ), 1.35–1.71 (m, 7H,  $3\text{CH}_2$ , PCH).  $^{13}\text{C}\{^1\text{H}\}$  NMR (125.77 MHz,  $\text{CDCl}_3$ ,  $25^\circ\text{C}$ ):  $\delta$  = 3.4 (pt,  $^3J_{\text{C,P}} = 2.6$  Hz,  $^4J_{\text{C,F}} = 2.6$  Hz,  $\text{Si}(\text{CH}_3)_3$ ), 3.4 (dd,  $^3J_{\text{C,P}} = 1.8$  Hz,  $^4J_{\text{C,F}} = 1.8$  Hz,  $\text{Si}(\text{CH}_3)_3$ ), 16.5 (s,  $4\text{-CH}_2$ ), 21.2 (s,  $\text{CH}_3$ ), 21.2 (s,  $\text{CH}_3$ ), 22.2 (s,  $\text{CH}_3$ ), 33.6 (d,  $^4J_{\text{C,P}} = 14.0$  Hz,  $\text{CH}_3$ ), 34.8 (s,  $\text{CH}_3$ ), 36.6 (dd,  $^1J_{\text{C,P}} = 19.6$  Hz,  $^2J_{\text{C,F}} = 8.2$  Hz, PCH), 40.3 (s,  $3\text{-CH}_2$ ), 41.4 (s,  $3\text{-CH}_2$ ), 61.9 (s,  $\underline{\text{C}}(\text{CH}_3)_2$ ), 62.5 (dd,  $^3J_{\text{C,P}} = 5.2$  Hz,  $^4J_{\text{C,F}} = 5.2$  Hz,  $\underline{\text{C}}(\text{CH}_3)_2$ ,  $^1J_{\text{C,W}} = 127.0$ ), 197.5 (dd,  $^2J_{\text{C,P}} = 8.2$  Hz,  $^3J_{\text{C,F}} = 3.0$  Hz, *cis*-CO), 198.9 (dd,  $^2J_{\text{C,P}} = 36.4$  Hz,  $^4J_{\text{C,F}} = 2.9$  Hz, *trans*-CO).  $^{31}\text{P}\{^1\text{H}\}$  NMR (121.51 MHz,  $\text{CDCl}_3$ ;  $25^\circ\text{C}$ ):  $\delta$  = 216.6 (d<sub>sat</sub>,  $^1J_{\text{P,W}} = 338.6$  Hz,  $^1J_{\text{P,F}} = 997.4$  Hz).  $^{19}\text{F}\{^1\text{H}\}$  NMR (282.37 MHz,  $\text{CDCl}_3$ ;  $25^\circ\text{C}$ ):  $\delta$  =  $-22.7$  (d<sub>sat</sub>,  $^1J_{\text{F,W}} = 20.0$  Hz,  $^1J_{\text{F,P}} = 997.4$  Hz). MS (EI, 70 eV,  $^{184}\text{W}$ ): 550.1  $[\text{M} - \text{TEMP} + \text{H}]^+$ , 622.1  $[\text{M} - \text{TEMP} + \text{SiMe}_3]^+$ . IR ( $\nu(\text{CO})$ , neat): 2072 (m), 1985 (m), 1916 (vs), 1900 (vs)  $\text{cm}^{-1}$ . Elemental analysis (%):  $\text{C}_{21}\text{H}_{37}\text{FNO}_6\text{PSi}_2\text{W}$  (689.50): C 36.58, H 5.41. Found: C 36.99, H 5.44.

### One-electron oxidation with $[\text{TEMPO}]\text{BF}_4$ .

**General procedure.** To a stirred solution of corresponding phosphane complex  $(\text{CO})_5\text{W}\{(\text{Me}_3\text{Si})_2\text{HCP}(\text{H})\text{F}\}$  (534.2 mg, 1 mmol) or  $(\text{CO})_5\text{W}\{(\text{Me}_3\text{Si})_2\text{HCPH}_2\}$  (434 mg, 1 mmol) and 12-crown-4 (0.175 mL, 1.12 mmol) in 18 mL of THF at  $-78^\circ\text{C}$  was slowly added solution of *n*-BuLi (1.6 M, 0.7 mL, 1.12 mmol). After 30 min the mixture was cooled down up to  $-90^\circ\text{C}$  and  $[\text{TEMPO}]\text{BF}_4$  (292 mg, 1.2 mmol) was added under argon atmosphere as a solid. Stirred reaction mixture was warmed up to  $-30^\circ\text{C}$  in a cooling bath (ca. 1 h). Volatiles were removed under reduced pressure (0.02 mbar). Crude product was extracted with *n*-pentane (ca.  $-20^\circ\text{C}$ ) and washed with the same solvent at  $-45^\circ\text{C}$ . The residue was kept at  $22^\circ\text{C}/0.011$  mbar for 2 h to afford the product as a white solid.

**Complex  $(\text{CO})_5\text{W}\{(\text{Me}_3\text{Si})_2\text{HCP}(\text{F})\text{TEMPO}\}$  (3a)** Yield: 518 mg (0.75 mmol, 75 %). Analytical data are identical to those, shown above.

**Complex  $(\text{CO})_5\text{W}\{(\text{Me}_3\text{Si})_2\text{HCP}(\text{H})\text{TEMPO}\}$  (3b)** Yield: 537 mg (0.80 mmol, 80 %), m.p.  $128^\circ\text{C}$  (dec.).  $^1\text{H}$  NMR (300.13 MHz,  $\text{CDCl}_3$ ,  $25^\circ\text{C}$ ):  $\delta$  = 0.23 (s<sub>sat</sub>,  $^2J_{\text{H,Si}} = 119.4$  Hz, 9H,  $\text{Si}(\text{CH}_3)_3$ ), 0.25 (s<sub>sat</sub>,  $^2J_{\text{H,Si}} = 119.4$  Hz, 9H,  $\text{Si}(\text{CH}_3)_3$ ), 0.9–1.5 (m, 6H,  $3\text{CH}_2$ ), 1.05 (s, 3H,  $\text{CH}_3$ ), 1.09 (s, 3H,  $\text{CH}_3$ ), 1.26 (s, 6H,  $2\text{CH}_3$ ), 1.53 (dd,  $^2J_{\text{H,P}} = 4.9$  Hz,  $^3J_{\text{H,H}} = 3.3$  Hz, 1H, PCH).  $^{13}\text{C}\{^1\text{H}\}$  NMR (125.77 MHz,  $\text{CDCl}_3$ ,  $25^\circ\text{C}$ ):  $\delta$  = 1.6 (d<sub>sat</sub>,  $^3J_{\text{C,P}} = 3.0$  Hz,  $^1J_{\text{C,Si}} = 52.4$  Hz,  $\text{Si}(\text{CH}_3)_3$ ), 2.7 (d<sub>sat</sub>,  $^3J_{\text{C,P}} = 2.6$  Hz,  $^1J_{\text{C,Si}} = 52.4$  Hz,  $\text{Si}(\text{CH}_3)_3$ ), 16.7 (s,  $4\text{-CH}_2$ ), 21.0 (s,  $\text{CH}_3$ ), 22.1 (s,  $\text{CH}_3$ ), 23.1 (d<sub>sat</sub>,  $^1J_{\text{C,P}} = 1.6$  Hz,  $^1J_{\text{C,Si}} = 35.6$  Hz, PCH), 34.6 (s,  $\text{CH}_3$ ), 35.4 (s,  $\text{CH}_3$ ), 40.6 (s,  $3\text{-CH}_2$ ).

CH<sub>2</sub>), 41.4 (s, 3-CH<sub>2</sub>), 62.4 (d, <sup>3</sup>J<sub>C,P</sub> = 10.4 Hz, 2C(CH<sub>3</sub>)<sub>2</sub>), 198.1 (d<sub>sat</sub>, <sup>2</sup>J<sub>C,P</sub> = 6.8 Hz, <sup>1</sup>J<sub>C,W</sub> = 126.3 Hz, *cis*-CO), 199.0 (d, <sup>2</sup>J<sub>C,P</sub> = 26.7 Hz, *trans*-CO). <sup>31</sup>P{<sup>1</sup>H} NMR (121.51 MHz, CDCl<sub>3</sub>; 25 °C): δ = 111.3 (s<sub>sat</sub>, <sup>1</sup>J<sub>P,W</sub> = 272.1 Hz). MS (EI, 70 eV, <sup>184</sup>W), m/z (%): 671.2 (5) [M]<sup>+</sup>. IR (ν(CO), neat): 2075 (m), 1930 (vs), 1904 (vs) cm<sup>-1</sup>. Elemental analysis (%): C<sub>21</sub>H<sub>38</sub>NO<sub>6</sub>PSi<sub>2</sub>W (671.51): C 37.56, H 5.70, N 2.09. Found: C 37.95, H 5.32, N 2.10.

### Thermolysis of 3a.

**Complex (CO)<sub>5</sub>W{(Me<sub>3</sub>Si)<sub>2</sub>HCP(F)SiMe<sub>3</sub>}** (**6**). Phosphane complex **3a** (150 mg, 0.217 mmol) was dissolved in 2 mL toluene and heated for 1 hour. Solvent was removed under reduced pressure (0.02 mbar). Crude product was extracted with *n*-pentane (ca. -20 °C) and was purified using column chromatography [-20 °C, Al<sub>2</sub>O<sub>3</sub>, *n*-pentane with TMSCl (ca. 2 %)]. After evaporation of volatiles, the residue was washed with *n*-pentane at -45 °C to afford the product as a white solid. Yield: 20 mg (0.032 mmol, 15 %), m.p. 63 °C (dec.). <sup>1</sup>H NMR (300.13 MHz, CDCl<sub>3</sub>, 25 °C): δ = 0.15 (d, <sup>4</sup>J<sub>C,P</sub> = 1.6 Hz, 9H, Si(CH<sub>3</sub>)<sub>3</sub>), 0.21 (s, 9H, Si(CH<sub>3</sub>)<sub>3</sub>), 0.22 (s, 9H, Si(CH<sub>3</sub>)<sub>3</sub>), 1.50 (pt, 1H, CHPF). <sup>13</sup>C{<sup>1</sup>H} NMR (125.77 MHz, CDCl<sub>3</sub>, 25 °C): δ = 1.4 (s, Si(CH<sub>3</sub>)<sub>3</sub>); 1.9 (d, <sup>3</sup>J<sub>C,P</sub> = 2.6 Hz, Si(CH<sub>3</sub>)<sub>3</sub>), 2.3 (pt, <sup>3</sup>J<sub>C,P</sub> = 2.5 Hz, <sup>4</sup>J<sub>C,F</sub> = 2.5 Hz, Si(CH<sub>3</sub>)<sub>3</sub>), 40.6 (dd, <sup>1</sup>J<sub>C,P</sub> = 10.5 Hz, <sup>2</sup>J<sub>C,F</sub> = 4.8 Hz, PCH), 197.1 (dd<sub>sat</sub>, <sup>1</sup>J<sub>C,W</sub> = 126.5, <sup>2</sup>J<sub>C,P</sub> = 9.3 Hz, <sup>3</sup>J<sub>C,F</sub> = 2.3 Hz, *cis*-CO), 198.9 (dd, <sup>2</sup>J<sub>C,P</sub> = 33.0 Hz, <sup>4</sup>J<sub>C,F</sub> = 3.3 Hz, *trans*-CO). <sup>31</sup>P{<sup>1</sup>H} NMR (121.51 MHz, CDCl<sub>3</sub>; 25 °C): δ = 191.3 (d<sub>sat</sub>, <sup>1</sup>J<sub>P,W</sub> = 342.1, <sup>1</sup>J<sub>P,F</sub> = 989.3). <sup>19</sup>F{<sup>1</sup>H} NMR (282.37 MHz, CDCl<sub>3</sub>; 25 °C): δ = -29.4 (d, <sup>1</sup>J<sub>P,F</sub> = 989.4). MS (EI, 70 eV, <sup>184</sup>W): 622.2 [M]<sup>+</sup>. [IR (ν(CO), neat): 2074 (m), 1965 (m), 1914 (vs) cm<sup>-1</sup>. Elemental analysis (%): C<sub>15</sub>H<sub>28</sub>FO<sub>6</sub>PSi<sub>3</sub>W (622.45): C 28.94, H 4.53. Found: C 29.02, H 4.77.

**Complex [TEMP-2H](CO)<sub>5</sub>W{(Me<sub>3</sub>Si)<sub>2</sub>HCP(F)O}** (**5**). Complex **5** was formed selectively from **3a** (250 mg, 0.362 mmol) in 18 mL of toluene, after heating at 40 °C for 80 min. <sup>31</sup>P{<sup>1</sup>H} NMR (121.51 MHz, toluene (reaction solution); 25 °C): δ = 157.9 ppm (d<sub>sat</sub>, <sup>1</sup>J<sub>P,W</sub> = 309.8 Hz, <sup>1</sup>J<sub>P,F</sub> = 952.9 Hz); the signal was the only one observed in the whole +1340 ÷ -710 ppm region of the spectrum. After evaporation of volatiles and extraction with *n*-pentane, obtained solution in <sup>31</sup>P NMR spectrum displayed the only signal of complex **6**. Single crystals of **5** were obtained during extraction with *n*-pentane at ca. 24 °C on the walls of a Schlenk-tube under intensive argon flow.

### Crystallographic data.

**Complex 3a** (C<sub>21</sub>H<sub>37</sub>FNO<sub>6</sub>PSi<sub>2</sub>W): *M* = 689.52, triclinic, *P* -1, *a* = 13.1797(3) Å, *b* = 14.2791(3) Å, *c* = 15.1502(3) Å, *V* = 2825.91(10) Å<sup>3</sup>, *Z* = 4; *d*<sub>calc.</sub> = 1.621 Mg/m<sup>3</sup>, *μ* = 4.269 mm<sup>-1</sup>, *T* = 123(2) K. A total 34076 reflections were measured on a Nonius KappaCCD diffractometer using monochromated Mo Kα radiation (λ = 0.71073 Å), 12234 reflections were unique (*R*<sub>int</sub> = 0.0404). A semiempirical absorption correction from equivalents was applied (min/max transmission 0.2800/0.4822). The structure was solved with Patterson methods and refined with full-matrix least-squares against *F*<sup>2</sup> of all reflections. Non-hydrogen atoms were refined anisotropically; hydrogen atoms were refined as rigid groups. *R* values [*I* > 2σ(*I*): *R*<sub>1</sub> = 0.0235, *wR*<sub>2</sub> = 0.0557. *R* values [all data]: *R*<sub>1</sub> = 0.0290, *wR*<sub>2</sub> = 0.0574, min/max difference electron difference -2.141/1.484.

**Complex 3b** (C<sub>21</sub>H<sub>39</sub>NO<sub>6</sub>PSi<sub>2</sub>W): *M* = 672.53 monoclinic, *P*<sub>21/c</sub> *a* = 14.7971(4) Å, *b* = 15.3781(4) Å, *c* = 12.4122(3) Å, *V* = 2811.70(13) Å<sup>3</sup>, *Z* = 4; *d*<sub>calc.</sub> = 1.589 Mg/m<sup>3</sup>, *μ* = 4.284 mm<sup>-1</sup>, *T* = 123(2) K. A total 23804 reflections were measured on a Nonius KappaCCD diffractometer using monochromated Mo Kα radiation (λ = 0.71073 Å), 6783 reflections were unique (*R*<sub>int</sub> = 0.0520). The structure was solved with Patterson methods and refined with full-matrix least-squares against *F*<sup>2</sup> of all reflections. Non-hydrogen atoms were refined anisotropically; hydrogen atoms were refined as rigid groups. *R* values [*I* > 2σ(*I*): *R*<sub>1</sub> = 0.0308, *wR*<sub>2</sub> = 0.0554. *R* values [all data]: *R*<sub>1</sub> = 0.0452, *wR*<sub>2</sub> = 0.0577, min/max difference electron difference -1.49/1.30.

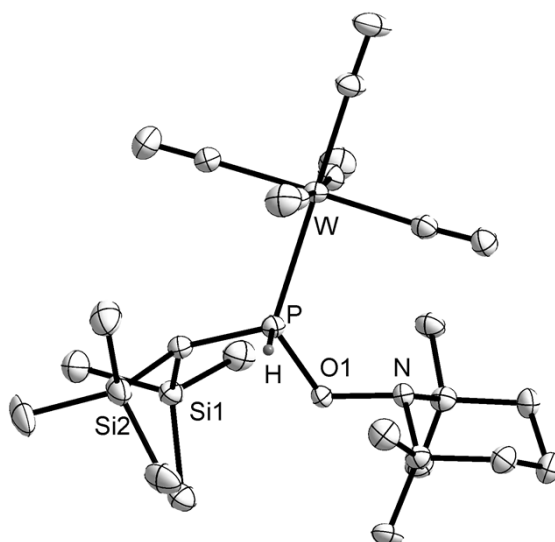

**Fig. S1** Molecular structure of complex **3b** (50% probability level; hydrogen atoms are omitted for clarity). Selected bond lengths [Å] and angles [°]: W–P 2.5117(8), P–O(1) 1.656(2), P–C 1.827(4), O–P–W 125.37(9), C(1)–P–W 119.30(11).

**Complex 5** ( $C_{21}H_{39}FNO_6PSi_2W$ ):  $M = 691.52$ , triclinic,  $P-1$ ,  $a = 9.1438(7)$ ,  $b = 12.12.6924(10)$  Å,  $c = 13.4939(11)$  Å,  $V = 1469.0(2)$  Å<sup>3</sup>,  $Z = 2$ ;  $d_{\text{calc.}} = 1.559$  Mg/m<sup>3</sup>,  $\mu = 4.106$  mm<sup>-1</sup>,  $T = 123(2)$  K. A total 48243 reflections were measured on a Nonius KappaCCD diffractometer using monochromated Mo K $\alpha$  radiation ( $\lambda = 0.71073$  Å), 6310 reflections were unique ( $R_{\text{int}} = 0.0701$ ). A semiempirical absorption correction from equivalents was applied (min/max transmission 0.4653/0.7347). The structure was solved with Patterson methods and refined with full-matrix least-squares against  $F^2$  of all reflections. Non-hydrogen atoms were refined anisotropically; hydrogen atoms were refined as rigid groups.  $R$  values [ $I > 2\sigma(I)$ ]:  $R_1 = 0.0547$ ,  $wR_2 = 0.1141$ .  $R$  values [all data]:  $R_1 = 0.0841$ ,  $wR_2 = 0.1344$ , min/max difference electron difference  $-2.036/3.440$ .

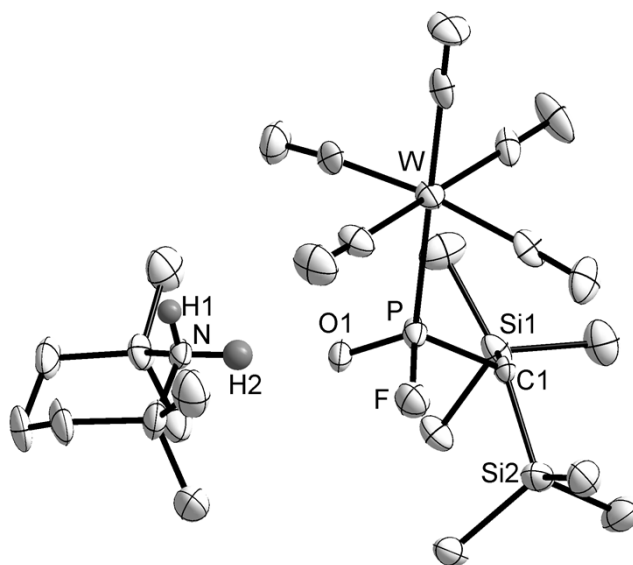

**Fig. S2** Molecular structure of complex **5** (50% probability level; hydrogen atoms are omitted for clarity). Selected bond lengths [Å] and angles [°]: W–P 2.519(2), P–O(1) 1.489(6), P–F 1.658(6), P–C(1) 1.828(7), H2–O1 1.6865(1), O–P–W 122.8(3), F–P–W 104.3(2), C(1)–P–W 116.1(3).

## C. Computational Details

The quantum chemical DFT calculations have been performed with the TURBOMOLE suite of programs.<sup>[1, 2]</sup> The structures are fully optimized at the TPSS-D3/def2-TZVP + COSMO level of theory, which combines the accurate TPSS meta-GGA density functional<sup>[3]</sup> with the BJ-damped DFT-D3 dispersion correction<sup>[4, 5]</sup> and the def2-TZVP basis set,<sup>[6-8]</sup> using the Conductor-like Screening Model (COSMO) continuum solvation model<sup>[9]</sup> for THF solvent (dielectric constant  $\epsilon = 7.58$ , refractive constant  $n = 1.407$ ,  $R_{\text{solv}} = 3.18 \text{ \AA}$ ). The density-fitting RI-J approach<sup>[10, 11]</sup> is used to accelerate the geometry optimization and numerical harmonic frequency calculations in solution. The optimized structures are characterized by frequency analysis to identify the nature of located stationary points (no imaginary frequency for true minima and only one imaginary frequency for transition state) and to provide thermal corrections according to the ideal gas–rigid rotor–harmonic oscillator model.<sup>[12]</sup>

To get better solvation free energies in both THF and toluene solvents, gas-phase single-point calculations are done at TPSS-D3 level of theory using larger def2-QZVP basis set<sup>[13]</sup>, and the COSMO-RS solvation model in the COSMOtherm program package<sup>[14]</sup> is applied to the above TPSS-D3 optimized structures, and. The final Gibbs free energies ( $\Delta G$ ) are determined from gas-phase TPSS-D3/def2-QZVP energies plus thermal (298.15 K, 1 atm) and COSMO-RS solvation corrections. In our discussion, the final Gibbs free energies (in kcal mol<sup>-1</sup>) will be used unless specified otherwise.

### References

- [1] R. Ahlrichs, M. Bär, M. Häser, H. Horn, C. Kölmel, *Chem. Phys. Lett.* **1989**, *162*, 165.
- [2] R. Ahlrichs, M. K. Armbruster, R. A. Bachorz, M. Bär, H.-P. Baron, R. Bauernschmitt, F. A. Bischoff, S. Böcker, N. Crawford, P. Deglmann, F. D. Sala, M. Diedenhofen, M. Ehrig, K. Eichkorn, S. Elliott, F. Furche, A. Glöß, F. Haase, M. Häser, C. Hättig, A. Hellweg, S. Höfener, H. Horn, C. Huber, U. Huniar, M. Kattannek, W. Klopper, A. Köhn, C. Kölmel, M. Kollwitz, K. May, P. Nava, C. Ochsenfeld, H. Öhm, M. Pabst, H. Patzelt, D. Rappoport, O. Rubner, A. Schäfer, U. Schneider, M. Sierka, D. P. Tew, O. Treutler, B. Unterreiner, M. von Arnim, F. Weigend, P. Weis, H. Weiss, N. Winter in TURBOMOLE v6.4, TURBOMOLE GmbH, **2012**.
- [3] J. M. Tao, J. P. Perdew, V. N. Staroverov, G. E. Scuseria *Phys. Rev. Lett.* **2003**, *91*, 146401.
- [4] S. Grimme, S. Ehrlich, H. Krieg, *D. 132 J. Chem. Phys.* **2010**, *132*, 154104.
- [5] S. Grimme, L. Goerigk, *J. Comput. Chem.* **2011**, *32*, 1456.
- [6] A. Schaefer, C. Huber, R. Ahlrichs, *J. Chem. Phys.* **1994**, *100*, 5829.
- [7] F. Weigend, M. Häser, H. Patzelt, R. Ahlrichs, *Chem. Phys. Lett.* **1998**, *143*, 294.
- [8] F. Weigend, R. Ahlrichs, *Phys. Chem. Chem. Phys.* **2005**, *7*, 3297.
- [9] A. Klamt; G. Schüürmann, *J. Chem. Soc. Perkin Trans.* 1993, *2*, 799.
- [10] K. Eichkorn, F. Weigend, O. Treutler, R. Ahlrichs, *Theor. Chem. Acc.* **1997**, *97*, 119.
- [11] P. Deglmann, K. May, F. Furche, R. Ahlrichs, *Chem. Phys. Lett.* **2004**, *384*, 103.
- [12] S. Grimme, *Chem. Eur. J.* **2012**, *18*, 9955
- [13] F. Weigend, R. Ahlrichs, *Phys. Chem. Chem. Phys.* **2005**, *7*, 3297.
- [14] F. Eckert, A. Klamt, COSMOtherm, Version C2.1, Release 01.11; COSMOlogic GmbH & Co. KG, Leverkusen, Germany, 2010.

**Table S1.** The TPSS-D3/def2-TZVP + COSMO computed zero-point energies, enthalpy corrections, Gibbs free energy corrections (ZPE, Hc and Gc, respectively, in kcal/mol), the COSMO-RS solvation enthalpies and free energies (Hcs and Gcs, respectively, in kcal/mol) in THF solvent, and the TPSS-D3/def2-QZVP single-point energies (Ee, in hartrees) for some crucial structures. For each structure, the number of atoms, the structure name and the total energy (in hartrees) are given followed by the Cartesian coordinates of each atom (in angstroms). Some structures derived from named neutral species such as the cation, anion, H-added, H-abstracted, and silyl-abstracted are named simply by adding the corresponding +, -, **H**, **mH** and **mS** suffixes to the neutral name.

| NAME                      | ZPE    | Hc     | Gc     | Hcs    | Gcs    | Ee           |
|---------------------------|--------|--------|--------|--------|--------|--------------|
| <b>1a</b>                 | 330.44 | 360.96 | 284.77 | -38.25 | -24.59 | -2556.576343 |
| <b>2a</b>                 | 176.26 | 197.41 | 139.22 | -15.29 | -5.39  | -1933.202585 |
| <b>2a-</b>                | 175.42 | 196.66 | 138.26 | -50.02 | -38.87 | -1933.299973 |
| <b>2aH</b>                | 182.69 | 203.91 | 145.47 | -15.97 | -5.94  | -1933.841892 |
| <b>3a</b>                 | 340.25 | 369.34 | 296.74 | -21.24 | -10.34 | -2417.332654 |
| <b>3a-</b>                | 338.71 | 367.88 | 295.14 | -57.84 | -45.45 | -2417.356142 |
| <b>3amS</b>               | 268.80 | 293.33 | 229.21 | -20.19 | -9.74  | -2007.864946 |
| <b>3amS-</b>              | 268.15 | 292.56 | 228.82 | -52.27 | -40.72 | -2007.967254 |
| <b>4</b>                  | 333.37 | 364.39 | 287.23 | -36.55 | -23.20 | -2631.940354 |
| <b>5</b>                  | 355.21 | 384.93 | 310.85 | -26.78 | -14.79 | -2418.631401 |
| <b>6</b>                  | 249.33 | 275.96 | 207.48 | -17.58 | -6.88  | -2418.015379 |
| <b>7</b>                  | 179.14 | 200.80 | 141.76 | -15.95 | -5.92  | -2008.509128 |
| <b>7-</b>                 | 178.40 | 200.14 | 140.80 | -50.37 | -39.38 | -2008.645567 |
| <b>7H</b>                 | 186.02 | 207.95 | 148.38 | -27.54 | -10.33 | -2009.152724 |
| <b>7H-TEMPH2+</b>         | 291.37 | 316.70 | 250.29 | -25.67 | -14.40 | -2009.812807 |
| <b>CPh<sub>3</sub></b>    | 172.01 | 181.83 | 147.71 | -20.45 | -10.59 | -733.526090  |
| <b>CPh<sub>3</sub>+</b>   | 173.28 | 183.09 | 148.99 | -54.84 | -42.50 | -733.312098  |
| <b>H</b>                  | 0.00   | 1.48   | -6.69  | -1.07  | 5.38   | -0.500161    |
| <b>PhCH<sub>2</sub></b>   | 71.31  | 75.42  | 53.55  | -9.27  | -1.92  | -271.095262  |
| <b>PhCH<sub>3</sub></b>   | 79.41  | 83.73  | 60.95  | -9.08  | -1.84  | -271.745709  |
| <b>TEMP</b>               | 158.36 | 166.00 | 136.60 | -11.52 | -3.82  | -408.781888  |
| <b>TEMP-</b>              | 155.63 | 163.01 | 134.12 | -58.12 | -48.90 | -408.804730  |
| <b>TEMPH</b>              | 166.18 | 174.03 | 144.19 | -11.93 | -3.92  | -409.438043  |
| <b>TEMPH<sub>2</sub>+</b> | 176.23 | 183.94 | 154.44 | -71.11 | -51.42 | -409.832862  |
| <b>TEMPO</b>              | 161.86 | 169.99 | 139.57 | -12.57 | -4.77  | -484.046161  |
| <b>TEMPO-</b>             | 159.58 | 167.78 | 137.27 | -60.33 | -51.13 | -484.053155  |
| <b>TEMPO+</b>             | 162.84 | 170.88 | 140.67 | -55.73 | -44.27 | -483.800897  |
| <b>TEMPOH</b>             | 168.74 | 177.01 | 146.48 | -17.46 | -6.06  | -484.657942  |
| <b>THF</b>                | 72.21  | 75.88  | 54.79  | -7.25  | -0.66  | -232.603972  |
| <b>THFmH</b>              | 63.79  | 67.40  | 46.57  | -7.40  | -0.75  | -231.948301  |

**Table S2.** The TPSS-D3/def2-TZVP + COSMO(THF) optimized geometries for some crucial structures. For each structure, the number of atoms, the structure name and the total energy (in hartrees) are given followed by the Cartesian coordinates of each atom (in angstroms). Some structures derived from named neutral species such as the cation, anion, H-added, H-abstracted, and silyl-abstracted are named simply by adding the corresponding +, -, **H**, **mH** and **mS** suffixes to the neutral name.

|           |                          |            |            |            |                          |            |            |
|-----------|--------------------------|------------|------------|------------|--------------------------|------------|------------|
| 70        |                          |            |            | H          | 1.1872583                | -4.7374766 | 0.8210564  |
| <b>1a</b> | Energy = -2556.472162664 |            |            | H          | -0.6311834               | -0.5943787 | 3.6441818  |
| P         | -0.0244626               | 1.0131212  | -0.4216000 | H          | -0.2193151               | -3.7057776 | 0.4479466  |
| F         | -0.5445287               | 1.9149732  | 0.8938731  | H          | 3.9888702                | -1.2689752 | 2.4028786  |
| C         | 2.7729609                | 3.5885529  | -3.0772626 | H          | -0.0536367               | -4.0150955 | 2.9132811  |
| W         | 1.5902340                | 2.4886487  | -1.8801162 | H          | -0.0650895               | -2.0655759 | 4.4820213  |
| C         | 0.0709796                | 2.9968888  | -3.1635640 | H          | 3.3460065                | -1.4940340 | -1.1951758 |
| C         | 3.2993332                | 2.1678010  | -0.7896497 | H          | 3.4830031                | 0.8957248  | 3.5665052  |
| C         | 1.9095035                | 0.7364851  | -2.8884427 | H          | 2.9323018                | 1.5935087  | 2.0199948  |
| C         | 1.1675268                | 4.0271172  | -0.5845399 | H          | 4.7238579                | -1.7676537 | -0.0957973 |
| O         | -0.7276397               | 3.3150706  | -3.9438720 | H          | 4.8472897                | 0.0694276  | 1.5921033  |
| O         | 2.0934568                | -0.2840532 | -3.4139649 |            |                          |            |            |
| O         | 4.3358768                | 2.0999190  | -0.2666577 | 42         |                          |            |            |
| O         | 0.9508220                | 4.8531314  | 0.1986449  | <b>2aH</b> | Energy = -1933.757640064 |            |            |
| O         | 3.4425053                | 4.2382115  | -3.7801073 | W          | 0.1134720                | 3.3669745  | -0.1852174 |
| C         | -1.6422457               | 0.8649275  | -1.3531652 | Si         | -0.1741685               | -1.7290760 | -1.5040364 |
| Si        | -2.2152101               | -0.9435679 | -1.3482592 | Si         | -0.0419685               | -0.9685629 | 1.6603987  |
| Si        | -2.9653475               | 2.1720402  | -0.9453010 | P          | 0.9220872                | 1.0232024  | -0.4428463 |
| C         | -3.7894510               | -1.1982256 | -2.3642651 | O          | 2.6721972                | 4.3096664  | -1.8951190 |
| C         | -0.8717934               | -1.9865757 | -2.1649456 | O          | 1.8235547                | 3.7903581  | 2.5066719  |
| C         | -2.5607407               | -1.5807179 | 0.3893972  | O          | -1.5456724               | 2.8984278  | -2.9010509 |
| C         | -4.1221299               | 2.3139153  | -2.4336179 | O          | -2.4304895               | 2.3296816  | 1.4787504  |
| C         | -3.9674259               | 1.6878445  | 0.5776594  | O          | -0.9402525               | 6.3779579  | -0.0129738 |
| C         | -2.2930200               | 3.9079193  | -0.6559798 | F          | 1.5114967                | 0.8139435  | -1.9451879 |
| Li        | 1.1126849                | -0.8146727 | 0.9620690  | C          | 1.5590933                | -2.3908808 | -1.8021018 |
| H         | -1.4026510               | 1.0805087  | -2.4046695 | C          | 1.2310801                | -2.3454516 | 1.7881075  |
| H         | -3.9897072               | -2.2738575 | -2.4568776 | C          | 0.5191154                | 0.4129689  | 2.8133812  |
| H         | -4.6653408               | -0.7389747 | -1.8924292 | C          | -0.8864597               | -0.9927238 | -3.0816322 |
| H         | -3.6958483               | -0.7885537 | -3.3767262 | C          | 1.7543102                | 3.9725745  | -1.2813634 |
| H         | -1.1679108               | -3.0432329 | -2.1955114 | C          | -0.2007988               | -0.3538628 | -0.1585341 |
| H         | -0.7057154               | -1.6563932 | -3.1979010 | C          | -1.3072480               | -3.1328389 | -0.9659735 |
| H         | 0.0850125                | -1.9202987 | -1.6372290 | C          | 1.2048298                | 3.6321767  | 1.5443021  |
| H         | -2.7169390               | -2.6671793 | 0.3603079  | C          | -1.7443664               | -1.5338679 | 2.2156091  |
| H         | -1.7354700               | -1.3845735 | 1.0790894  | C          | -0.9496250               | 3.0709297  | -1.9265359 |
| H         | -3.4666635               | -1.1274417 | 0.8045197  | C          | -1.5117982               | 2.7116094  | 0.8883629  |
| H         | -4.8612464               | 3.1043892  | -2.2486933 | C          | -0.5587771               | 5.2859946  | -0.0709985 |
| H         | -3.5593280               | 2.5909308  | -3.3333354 | H          | 1.3405247                | -2.6308114 | 2.8417793  |
| H         | -4.6658938               | 1.3895809  | -2.6476986 | H          | 0.9485759                | -3.2420682 | 1.2278314  |
| H         | -4.6409261               | 2.5085255  | 0.8555417  | H          | 1.9914853                | -2.8414136 | -0.9034126 |
| H         | -4.5834336               | 0.7988771  | 0.4018451  | H          | 2.2142513                | -2.0164297 | 1.4321238  |
| H         | -3.3094695               | 1.4848565  | 1.4297049  | H          | 1.5143214                | -3.1692733 | -2.5742318 |
| H         | -3.1456687               | 4.5946414  | -0.5662533 | H          | 2.2380030                | -1.6084390 | -2.1547270 |
| H         | -1.7021948               | 3.9704122  | 0.2601755  | H          | 1.5082908                | 0.8100588  | 2.5609640  |
| H         | -1.6729498               | 4.2598854  | -1.4857066 | H          | -0.9802794               | -1.7701029 | -3.8500224 |
| O         | 1.5614259                | -2.7624258 | 0.2254382  | H          | -0.2561771               | -0.1932551 | -3.4825911 |
| O         | 1.6828148                | 0.1834099  | 2.7609581  | H          | 0.5896001                | -0.0012594 | 3.8275780  |
| O         | 0.1292489                | -2.0008941 | 2.3953555  | H          | -1.3626061               | -3.8675656 | -1.7794822 |
| O         | 3.1318699                | -0.6044544 | 0.6154958  | H          | -0.9508547               | -3.6559307 | -0.0728942 |
| C         | 1.5043436                | -0.6897537 | 3.8888015  | H          | -1.7069571               | -1.8354980 | 3.2695635  |
| C         | 2.9813586                | -2.9929605 | 0.3080014  | H          | -0.1865826               | 1.2479887  | 2.8487768  |
| C         | 0.6404875                | -3.3456094 | 2.3892134  | H          | -1.8865181               | -0.5796038 | -2.9027007 |
| C         | 0.7615629                | -3.7335679 | 0.9275116  | H          | -2.1169089               | -2.3825153 | 1.6348673  |
| C         | 0.1566485                | -1.3510311 | 3.6819214  | H          | -1.2116410               | 0.8426274  | -0.2331392 |
| C         | 3.0278089                | 0.6708479  | 2.5952873  | H          | -2.3252306               | -2.7767177 | -0.7716900 |
| C         | 3.6322200                | -1.7071270 | -0.1625500 | H          | -2.4696356               | -0.7163373 | 2.1281886  |
| C         | 3.8583296                | -0.3416464 | 1.8285966  | H          | 2.0887270                | 0.6057048  | 0.2312060  |
| H         | 1.5171968                | -0.1111035 | 4.8216768  |            |                          |            |            |
| H         | 2.3092606                | -1.4363073 | 3.9285958  | 41         |                          |            |            |
| H         | 1.6145650                | -3.3852705 | 2.8950114  | <b>2a-</b> | Energy = -1933.257421243 |            |            |
| H         | 3.2624539                | -3.8369065 | -0.3345343 | W          | 0.1872920                | 3.3904295  | -0.1441306 |
| H         | 3.2694974                | -3.2257506 | 1.3417378  | Si         | -0.1452591               | -1.6341313 | -1.4756898 |

|           |                          |            |            |                                      |            |            |            |
|-----------|--------------------------|------------|------------|--------------------------------------|------------|------------|------------|
| Si        | -0.0066837               | -0.9104125 | 1.6326199  | H                                    | 2.2520139  | -1.6772481 | -2.1376824 |
| P         | 1.2177192                | 0.9692437  | -0.3591637 | H                                    | 1.6007699  | 0.7984830  | 2.5626376  |
| O         | 2.7895962                | 4.2425819  | -1.8301358 | H                                    | -0.9601793 | -1.6022395 | -3.8437510 |
| O         | 1.8319045                | 3.8588700  | 2.5771762  | H                                    | -0.1466438 | -0.0850278 | -3.4229051 |
| O         | -1.3332797               | 2.6001693  | -2.8619531 | H                                    | 0.7019801  | 0.0083355  | 3.8661777  |
| O         | -2.3134667               | 2.1836642  | 1.4637046  | H                                    | -1.4742023 | -3.7443674 | -1.8259563 |
| O         | -1.0037532               | 6.3364228  | -0.1228770 | H                                    | -1.0073553 | -3.6158836 | -0.1250792 |
| F         | 1.4721969                | 0.8814904  | -2.0332032 | H                                    | -1.5453143 | -1.9080846 | 3.3476921  |
| C         | 1.5800726                | -2.3141788 | -1.8162115 | H                                    | -0.0954875 | 1.2234736  | 2.8602663  |
| C         | 1.2684433                | -2.2958251 | 1.7704681  | H                                    | -1.8025970 | -0.3890523 | -2.8662626 |
| C         | 0.5519385                | 0.4319655  | 2.8394303  | H                                    | -1.9823361 | -2.4559958 | 1.7204780  |
| C         | -0.8826568               | -0.9551497 | -3.0729633 | H                                    | -1.1662847 | 0.0546716  | -0.1150923 |
| C         | 1.8439235                | 3.9500016  | -1.2223376 | H                                    | -2.3563295 | -2.6470383 | -0.7519656 |
| C         | -0.1560553               | -0.2741632 | -0.1521512 | H                                    | -2.3544136 | -0.7987648 | 2.2293604  |
| C         | -1.2575245               | -3.0808155 | -0.9672715 |                                      |            |            |            |
| C         | 1.2301010                | 3.6907303  | 1.5963444  |                                      |            |            |            |
| C         | -1.6921246               | -1.5184386 | 2.2288789  | 57                                   |            |            |            |
| C         | -0.7850825               | 2.9018206  | -1.8848477 | <b>3amS</b> Energy = -2007.909292004 |            |            |            |
| C         | -1.4032797               | 2.6385456  | 0.8994384  | P                                    | 1.3060977  | 0.7686921  | 0.6227878  |
| C         | -0.5546692               | 5.2544140  | -0.1168495 | O                                    | -0.3083803 | 0.3474866  | 0.4402874  |
| H         | 1.3894693                | -2.5798881 | 2.8236670  | N                                    | -0.8795219 | 0.3286159  | -0.9035009 |
| H         | 0.9863808                | -3.1945668 | 1.2120121  | C                                    | 4.0098214  | 2.2664999  | -2.7352475 |
| H         | 2.0230408                | -2.7754096 | -0.9276494 | W                                    | 2.7268443  | 1.6122926  | -1.3313796 |
| H         | 2.2428068                | -1.9565534 | 1.3999867  | C                                    | 4.1441088  | 1.9125630  | 0.1235376  |
| H         | 1.5245790                | -3.0812019 | -2.5998184 | C                                    | 1.3325255  | 1.3280565  | -2.8254705 |
| H         | 2.2515733                | -1.5213398 | -2.1595521 | C                                    | 2.0300299  | 3.5181562  | -1.0088961 |
| H         | 1.5004820                | 0.8849015  | 2.5310038  | C                                    | 3.3664599  | -0.3310583 | -1.5442583 |
| H         | -0.9417778               | -1.7448867 | -3.8333735 | O                                    | 4.9629724  | 2.0931217  | 0.9248637  |
| H         | -0.2812469               | -0.1317381 | -3.4677087 | O                                    | 1.6561051  | 4.5989760  | -0.8205063 |
| H         | 0.7032278                | -0.0226706 | 3.8278548  | O                                    | 0.6412296  | 1.2101352  | -3.7489814 |
| H         | -1.3033322               | -3.8054757 | -1.7912366 | O                                    | 3.7410337  | -1.4212088 | -1.6598457 |
| H         | -0.8938686               | -3.6103300 | -0.0801264 | O                                    | 4.7671262  | 2.6511837  | -3.5386733 |
| H         | -1.6341727               | -1.8203472 | 3.2826355  | F                                    | 0.8966631  | 2.1048572  | 1.5471749  |
| H         | -0.1853026               | 1.2325933  | 2.9484653  | C                                    | 1.9925040  | -0.3966030 | 1.6140608  |
| H         | -1.8982724               | -0.5769860 | -2.9029242 | Si                                   | 1.2570528  | -1.3281211 | 2.9963485  |
| H         | -2.0580456               | -2.3735421 | 1.6519647  | H                                    | 3.0501831  | -0.5363052 | 1.3908911  |
| H         | -1.1486690               | 0.1907234  | -0.2515022 | C                                    | 0.8093246  | -3.1185335 | 2.5381053  |
| H         | -2.2815321               | -2.7453591 | -0.7638830 | C                                    | 2.4960326  | -1.4643207 | 4.4287739  |
| H         | -2.4346925               | -0.7151581 | 2.1519092  | C                                    | -0.3152243 | -0.5042489 | 3.6535723  |
|           |                          |            |            | H                                    | 2.0980879  | -2.0688034 | 5.2551316  |
|           |                          |            |            | H                                    | 3.4298340  | -1.9337027 | 4.0920785  |
| 41        |                          |            |            | H                                    | 2.7482618  | -0.4718727 | 4.8215870  |
| <b>2a</b> | Energy = -1933.117713405 |            |            | H                                    | 0.4076252  | -3.6717741 | 3.3984595  |
| W         | 0.1669731                | 3.4019115  | -0.2142369 | H                                    | 0.0619047  | -3.1451803 | 1.7370405  |
| Si        | -0.1666955               | -1.6808870 | -1.4943615 | H                                    | 1.6966246  | -3.6544594 | 2.1765697  |
| Si        | 0.0686624                | -1.0026395 | 1.7069338  | H                                    | -0.7518189 | -1.0847633 | 4.4769122  |
| P         | 0.9414501                | 1.0560189  | -0.3635549 | H                                    | -0.0983294 | 0.5056206  | 4.0214675  |
| O         | 2.8207080                | 4.3623261  | -1.7678652 | H                                    | -1.0662477 | -0.4098938 | 2.8614856  |
| O         | 1.6202877                | 4.0075468  | 2.5991041  | C                                    | -2.0086568 | 1.3130802  | -0.8978273 |
| O         | -1.2592780               | 2.8456530  | -3.0445466 | C                                    | -2.7094312 | 1.2008042  | -2.2662575 |
| O         | -2.4052083               | 2.2740059  | 1.3401249  | C                                    | -3.0141217 | 1.1465796  | 0.2601758  |
| O         | -1.0933481               | 6.3356451  | -0.2615004 | C                                    | -1.3814910 | 2.7089967  | -0.7930982 |
| F         | 1.7130918                | 0.7371842  | -1.7651116 | C                                    | -3.1376351 | -0.2251445 | -2.6039977 |
| C         | 1.5256969                | -2.4298517 | -1.8177659 | H                                    | -3.5675864 | 1.8839532  | -2.2582593 |
| C         | 1.3587349                | -2.3655486 | 1.7850530  | H                                    | -2.0145220 | 1.5554372  | -3.0372738 |
| C         | 0.6209262                | 0.3954985  | 2.8424016  | C                                    | -1.9085088 | -1.1305445 | -2.5707455 |
| C         | -0.8279336               | -0.8564463 | -3.0501615 | H                                    | -3.8960700 | -0.5779131 | -1.8940625 |
| C         | 1.8687552                | 4.0220939  | -1.2126130 | H                                    | -3.6004442 | -0.2539717 | -3.5978209 |
| C         | -0.1440142               | -0.3603269 | -0.1007419 | C                                    | -1.1823423 | -1.1068613 | -1.2115933 |
| C         | -1.3626630               | -3.0436924 | -0.9886453 | H                                    | -2.1740228 | -2.1720894 | -2.7890911 |
| C         | 1.1026730                | 3.7776466  | 1.5943270  | H                                    | -1.2029713 | -0.8020063 | -3.3434843 |
| C         | -1.6117996               | -1.6028954 | 2.2960621  | C                                    | -2.0028373 | -1.8453388 | -0.1339298 |
| C         | -0.7490978               | 3.0454847  | -2.0294862 | C                                    | 0.1676273  | -1.8182498 | -1.3672214 |
| C         | -1.4838906               | 2.6988193  | 0.7852916  | H                                    | -3.6287060 | 2.0512078  | 0.3291074  |
| C         | -0.6207335               | 5.2794059  | -0.2296368 | H                                    | -3.6849953 | 0.2966512  | 0.1205671  |
| H         | 1.5181273                | -2.6518473 | 2.8320125  | H                                    | -2.4767870 | 1.0206381  | 1.2032703  |
| H         | 1.0542426                | -3.2632943 | 1.2372153  | H                                    | -1.6062303 | -1.6187506 | 0.8577391  |
| H         | 1.9266450                | -2.9421023 | -0.9379139 | H                                    | -3.0629651 | -1.5850128 | -0.1575371 |
| H         | 2.3205687                | -2.0282276 | 1.3820287  | H                                    | -1.9195432 | -2.9249950 | -0.3007184 |
| H         | 1.4334990                | -3.1727427 | -2.6203305 | H                                    | -2.1633966 | 3.4693420  | -0.9013451 |



|             |                          |            |            |    |            |            |            |
|-------------|--------------------------|------------|------------|----|------------|------------|------------|
| H           | -0.8872445               | 2.8470310  | 0.1705183  | O  | -0.7426310 | 0.1782299  | 0.1272817  |
| H           | -0.6430236               | 2.8486467  | -1.5864503 | N  | -1.4974225 | 0.5182405  | -1.1228871 |
| H           | -0.0005049               | -2.8584950 | -1.6690705 | C  | 3.6691607  | 2.2535603  | -3.4629466 |
| H           | 0.7652501                | -1.3215157 | -2.1360790 | W  | 2.4257945  | 1.4797477  | -2.1494666 |
| H           | 0.7322300                | -1.8068877 | -0.4298906 | C  | 3.9159808  | 0.9188847  | -0.8560375 |
|             |                          |            |            | C  | 0.7761419  | 1.9476093  | -3.2787011 |
| 57          |                          |            |            | C  | 2.2817164  | 3.3133002  | -1.2379795 |
| <b>3amS</b> | Energy = -2007.909292004 |            |            | C  | 2.5298450  | -0.2901480 | -3.1818713 |
| P           | 1.3060977                | 0.7686921  | 0.6227878  | O  | 4.7723166  | 0.5951078  | -0.1114033 |
| O           | -0.3083803               | 0.3474866  | 0.4402874  | O  | 2.2099715  | 4.3817134  | -0.7638366 |
| N           | -0.8795219               | 0.3286159  | -0.9035009 | O  | -0.1373714 | 2.2273257  | -3.9608544 |
| C           | 4.0098214                | 2.2664999  | -2.7352475 | O  | 2.6240005  | -1.2433158 | -3.8614691 |
| W           | 2.7268443                | 1.6122926  | -1.3313796 | O  | 4.4181793  | 2.7224878  | -4.2375567 |
| C           | 4.1441088                | 1.9125630  | 0.1235376  | F  | 0.7518154  | 2.0672889  | 0.7765939  |
| C           | 1.3325255                | 1.3280565  | -2.8254705 | C  | 1.6092185  | -0.2950500 | 1.3727205  |
| C           | 2.0300299                | 3.5181562  | -1.0088961 | Si | 1.0283091  | 0.2679545  | 3.1101060  |
| C           | 3.3664599                | -0.3310583 | -1.5442583 | Si | 1.8605954  | -2.1622590 | 1.1061240  |
| O           | 4.9629724                | 2.0931217  | 0.9248637  | H  | 2.6457914  | 0.0838683  | 1.3122686  |
| O           | 1.6561051                | 4.5989760  | -0.8205063 | C  | 1.4310760  | -0.9944750 | 4.4597778  |
| O           | 0.6412296                | 1.2101352  | -3.7489814 | C  | 1.9666106  | 1.8320151  | 3.5899252  |
| O           | 3.7410337                | -1.4212088 | -1.6598457 | C  | -0.8291645 | 0.5517113  | 3.1988362  |
| O           | 4.7671262                | 2.6511837  | -3.5386733 | C  | 3.2251896  | -2.7852448 | 2.2551812  |
| F           | 0.8966631                | 2.1048572  | 1.5471749  | C  | 0.2668635  | -3.1085739 | 1.4422851  |
| C           | 1.9925040                | -0.3966030 | 1.6140608  | C  | 2.5068354  | -2.5296297 | -0.6210072 |
| Si          | 1.2570528                | -1.3281211 | 2.9963485  | H  | 0.4166489  | -4.1830298 | 1.2795088  |
| H           | 3.0501831                | -0.5363052 | 1.3908911  | H  | -0.0702271 | -2.9692124 | 2.4758298  |
| C           | 0.8093246                | -3.1185335 | 2.5381053  | H  | -0.5415664 | -2.7756777 | 0.7845701  |
| C           | 2.4960326                | -1.4643207 | 4.4287739  | H  | 3.5662404  | -3.7632545 | 1.8912801  |
| C           | -0.3152243               | -0.5042489 | 3.6535723  | H  | 4.0883650  | -2.1085303 | 2.2363380  |
| H           | 2.0980879                | -2.0688034 | 5.2551316  | H  | 2.9096572  | -2.9066318 | 3.2939613  |
| H           | 3.4298340                | -1.9337027 | 4.0920785  | H  | 2.6004843  | -3.6160812 | -0.7501986 |
| H           | 2.7482618                | -0.4718727 | 4.8215870  | H  | 1.8794132  | -2.1440720 | -1.4249208 |
| H           | 0.4076252                | -3.6717741 | 3.3984595  | H  | 3.5023936  | -2.0888943 | -0.7462089 |
| H           | 0.0619047                | -3.1451803 | 1.7370405  | H  | 1.7022280  | 2.1361483  | 4.6109659  |
| H           | 1.6966246                | -3.6544594 | 2.1765697  | H  | 3.0489120  | 1.6513684  | 3.5674929  |
| H           | -0.7518189               | -1.0847633 | 4.4769122  | H  | 1.7494873  | 2.6614449  | 2.9116525  |
| H           | -0.0983294               | 0.5056206  | 4.0214675  | H  | 1.0362945  | -0.6012882 | 5.4064629  |
| H           | -1.0662477               | -0.4098938 | 2.8614856  | H  | 0.9719785  | -1.9746796 | 4.2939972  |
| C           | -2.0086568               | 1.3130802  | -0.8978273 | H  | 2.5092583  | -1.1375130 | 4.5853841  |
| C           | -2.7094312               | 1.2008042  | -2.2662575 | H  | -1.1131633 | 0.7795082  | 4.2343679  |
| C           | -3.0141217               | 1.1465796  | 0.2601758  | H  | -1.1431333 | 1.3822079  | 2.5617012  |
| C           | -1.3814910               | 2.7089967  | -0.7930982 | H  | -1.3815584 | -0.3395680 | 2.8812123  |
| C           | -3.1376351               | -0.2251445 | -2.6039977 | C  | -2.5431073 | 1.5282226  | -0.7723492 |
| H           | -3.5675864               | 1.8839532  | -2.2582593 | C  | -3.3123467 | 1.8050722  | -2.0838580 |
| H           | -2.0145220               | 1.5554372  | -3.0372738 | C  | -3.5031465 | 1.1316224  | 0.3671414  |
| C           | -1.9085088               | -1.1305445 | -2.5707455 | C  | -1.8371637 | 2.8323235  | -0.3783160 |
| H           | -3.8960700               | -0.5779131 | -1.8940625 | C  | -3.8695763 | 0.5451579  | -2.7386196 |
| H           | -3.6004442               | -0.2539717 | -3.5978209 | H  | -4.1113650 | 2.5181981  | -1.8478944 |
| C           | -1.1823423               | -1.1068613 | -1.2115933 | H  | -2.6226565 | 2.2955744  | -2.7808196 |
| H           | -2.1740228               | -2.1720894 | -2.7890911 | C  | -2.7209145 | -0.4250952 | -2.9954586 |
| H           | -1.2029713               | -0.8020063 | -3.3434843 | H  | -4.6309858 | 0.0811781  | -2.0991320 |
| C           | -2.0028373               | -1.8453388 | -0.1339298 | H  | -4.3661345 | 0.8004858  | -3.6822746 |
| C           | 0.1676273                | -1.8182498 | -1.3672214 | C  | -1.9427308 | -0.7806194 | -1.7124331 |
| H           | -3.6287060               | 2.0512078  | 0.3291074  | H  | -3.0793289 | -1.3633358 | -3.4358081 |
| H           | -3.6849953               | 0.2966512  | 0.1205671  | H  | -2.0175250 | 0.0287199  | -3.7040082 |
| H           | -2.4767870               | 1.0206381  | 1.2032703  | C  | -2.7790600 | -1.6842919 | -0.7819211 |
| H           | -1.6062303               | -1.6187506 | 0.8577391  | C  | -0.6787982 | -1.5404811 | -2.1224228 |
| H           | -3.0629651               | -1.5850128 | -0.1575371 | H  | -4.0213638 | 2.0302722  | 0.7202090  |
| H           | -1.9195432               | -2.9249950 | -0.3007184 | H  | -4.2607155 | 0.4112298  | 0.0536590  |
| H           | -2.1633966               | 3.4693420  | -0.9013451 | H  | -2.9413786 | 0.7105975  | 1.2040462  |
| H           | -0.8872445               | 2.8470310  | 0.1705183  | H  | -2.3639818 | -1.6736387 | 0.2289638  |
| H           | -0.6430236               | 2.8486467  | -1.5864503 | H  | -3.8279297 | -1.3862440 | -0.7302688 |
| H           | -0.0005049               | -2.8584950 | -1.6690705 | H  | -2.7416565 | -2.7127561 | -1.1576935 |
| H           | 0.7652501                | -1.3215157 | -2.1360790 | H  | -2.5657739 | 3.6501194  | -0.4107894 |
| H           | 0.7322300                | -1.8068877 | -0.4298906 | H  | -1.4265092 | 2.7778139  | 0.6303931  |
|             |                          |            |            | H  | -1.0226933 | 3.0501953  | -1.0746177 |
| 70          |                          |            |            | H  | -0.9450436 | -2.3627472 | -2.7954524 |
| <b>3a-</b>  | Energy = -2417.285112265 |            |            | H  | 0.0187798  | -0.8681670 | -2.6290462 |
| P           | 0.8551753                | 0.6366677  | -0.0193257 | H  | -0.1826053 | -1.9686684 | -1.2503831 |

70

**3a** Energy = -2417.217145369

|    |            |            |            |
|----|------------|------------|------------|
| P  | 0.9167035  | 0.7268335  | 0.0402320  |
| O  | -0.6256118 | 0.1982459  | 0.0150634  |
| N  | -1.4321695 | 0.5475704  | -1.2150380 |
| C  | 3.4674818  | 2.2108272  | -3.4339727 |
| W  | 2.2722245  | 1.4306133  | -2.0066002 |
| C  | 3.9229508  | 0.9582237  | -0.8831250 |
| C  | 0.6219200  | 1.8556312  | -3.1802499 |
| C  | 2.2027510  | 3.3340207  | -1.2134964 |
| C  | 2.4425671  | -0.3432261 | -3.0363093 |
| O  | 4.8570223  | 0.6822332  | -0.2564724 |
| O  | 2.1964934  | 4.4230950  | -0.8310829 |
| O  | -0.2262228 | 2.1188178  | -3.9179429 |
| O  | 2.5910042  | -1.2641415 | -3.7203287 |
| O  | 4.1647713  | 2.6751312  | -4.2373715 |
| F  | 0.7584197  | 2.1163355  | 0.8760134  |
| C  | 1.6267456  | -0.2728072 | 1.3754630  |
| Si | 0.9923943  | 0.2317880  | 3.1370223  |
| Si | 1.8898280  | -2.1533400 | 1.1076948  |
| H  | 2.6658488  | 0.1034156  | 1.3723832  |
| C  | 1.3701063  | -1.0712265 | 4.4463990  |
| C  | 1.9240381  | 1.7756773  | 3.6794779  |
| C  | -0.8646237 | 0.5039212  | 3.1574858  |
| C  | 3.2640845  | -2.7203730 | 2.2675676  |
| C  | 0.2974377  | -3.0998529 | 1.4203868  |
| C  | 2.5477097  | -2.5572584 | -0.6059204 |
| H  | 0.4809814  | -4.1776389 | 1.3336668  |
| H  | -0.1084609 | -2.9082997 | 2.4192026  |
| H  | -0.4734914 | -2.8320357 | 0.6918359  |
| H  | 3.6333601  | -3.6895001 | 1.9091683  |
| H  | 4.1093923  | -2.0214471 | 2.2485241  |
| H  | 2.9505968  | -2.8467551 | 3.3053026  |
| H  | 2.7775776  | -3.6304016 | -0.6339577 |
| H  | 1.8508119  | -2.3505886 | -1.4181771 |
| H  | 3.4790520  | -2.0176896 | -0.8102273 |
| H  | 1.6609903  | 2.0205806  | 4.7162376  |
| H  | 3.0072678  | 1.6029255  | 3.6478332  |
| H  | 1.6999835  | 2.6431536  | 3.0536061  |
| H  | 0.9256083  | -0.7085538 | 5.3829943  |
| H  | 0.9405471  | -2.0559311 | 4.2397614  |
| H  | 2.4443760  | -1.1894824 | 4.6176533  |
| H  | -1.1917430 | 0.6663510  | 4.1919553  |
| H  | -1.1577024 | 1.3750194  | 2.5663682  |
| H  | -1.4000307 | -0.3684054 | 2.7670073  |
| C  | -2.4647471 | 1.5674205  | -0.8234086 |
| C  | -3.2947378 | 1.8199277  | -2.1045252 |
| C  | -3.3791732 | 1.1885998  | 0.3569681  |
| C  | -1.7507359 | 2.8804820  | -0.4784350 |
| C  | -3.8965817 | 0.5514328  | -2.6982554 |
| H  | -4.0737509 | 2.5437682  | -1.8392433 |
| H  | -2.6446995 | 2.2954480  | -2.8478679 |
| C  | -2.7736820 | -0.4372055 | -2.9892182 |
| H  | -4.6299147 | 0.1126018  | -2.0111606 |
| H  | -4.4363196 | 0.7895195  | -3.6216439 |
| C  | -1.9251383 | -0.7681561 | -1.7432104 |
| H  | -3.1633768 | -1.3852454 | -3.3773154 |
| H  | -2.1106638 | -0.0165413 | -3.7547386 |
| C  | -2.7168976 | -1.6346180 | -0.7424247 |
| C  | -0.7005303 | -1.5543761 | -2.2116206 |
| H  | -3.8612625 | 2.0995462  | 0.7273182  |
| H  | -4.1658890 | 0.4869378  | 0.0775129  |
| H  | -2.7971683 | 0.7576881  | 1.1730660  |
| H  | -2.2553105 | -1.6024614 | 0.2468456  |
| H  | -3.7590424 | -1.3266435 | -0.6490067 |
| H  | -2.7066055 | -2.6724031 | -1.0912641 |
| H  | -2.4798766 | 3.6958399  | -0.5230838 |
| H  | -1.3290111 | 2.8602730  | 0.5262426  |

|   |            |            |            |
|---|------------|------------|------------|
| H | -0.9508240 | 3.0893401  | -1.1943146 |
| H | -1.0244749 | -2.4435691 | -2.7610296 |
| H | -0.0849157 | -0.9368836 | -2.8681473 |
| H | -0.0976615 | -1.8821776 | -1.3640727 |

71

**4** Energy = -2631.828444774

|    |            |            |            |
|----|------------|------------|------------|
| P  | -0.2844543 | 1.4597755  | -0.4895756 |
| F  | -0.9916336 | 2.2553326  | 0.7614974  |
| C  | 2.8510879  | 3.9285020  | -2.7361834 |
| W  | 1.4244368  | 2.9152172  | -1.7251352 |
| C  | 0.1508309  | 3.1425474  | -3.3193659 |
| C  | 2.6964263  | 2.7360492  | -0.1220279 |
| C  | 2.0675878  | 1.1119984  | -2.4710864 |
| C  | 0.7202237  | 4.6371211  | -0.8473764 |
| O  | -0.5548709 | 3.2747574  | -4.2303099 |
| O  | 2.4261043  | 0.0866873  | -2.8749796 |
| O  | 3.4358647  | 2.6910594  | 0.7687595  |
| O  | 0.3515692  | 5.6036151  | -0.3268816 |
| O  | 3.6793956  | 4.5044707  | -3.3192210 |
| O  | 0.2887387  | 0.2035036  | 0.1496328  |
| C  | -1.7812334 | 1.0249866  | -1.4603603 |
| Si | -2.2380784 | -0.8190093 | -1.2705971 |
| Si | -3.2256795 | 2.2649815  | -1.3679905 |
| C  | -3.8150324 | -1.2062182 | -2.2434506 |
| C  | -0.8826132 | -1.8600686 | -2.0651789 |
| C  | -2.5520187 | -1.3207197 | 0.5145918  |
| C  | -4.1798689 | 2.1930090  | -2.9953106 |
| C  | -4.3659257 | 1.8626895  | 0.0774811  |
| C  | -2.6764310 | 4.0576183  | -1.1789827 |
| Li | 1.3703680  | -0.8429670 | 1.1609777  |
| H  | -1.4363002 | 1.0950551  | -2.5050357 |
| H  | -4.0022493 | -2.2871091 | -2.1879403 |
| H  | -4.7001526 | -0.6984678 | -1.8453028 |
| H  | -3.7190589 | -0.9413413 | -3.3027593 |
| H  | -1.1533358 | -2.9240281 | -2.0489030 |
| H  | -0.7554477 | -1.5702230 | -3.1163677 |
| H  | 0.0768144  | -1.7341032 | -1.5581939 |
| H  | -2.8727811 | -2.3703380 | 0.5520892  |
| H  | -1.6529308 | -1.2106915 | 1.1243911  |
| H  | -3.3490306 | -0.7153167 | 0.9600909  |
| H  | -4.9686006 | 2.9563142  | -2.9926765 |
| H  | -3.5124903 | 2.4104239  | -3.8384779 |
| H  | -4.6508328 | 1.2235472  | -3.1790378 |
| H  | -5.1568701 | 2.6197266  | 0.1508432  |
| H  | -4.8491503 | 0.8854772  | -0.0294172 |
| H  | -3.8072552 | 1.8648165  | 1.0202194  |
| H  | -3.5683629 | 4.6972275  | -1.2185858 |
| H  | -2.1694135 | 4.2402742  | -0.2286532 |
| H  | -2.0099782 | 4.3734602  | -1.9877097 |
| O  | 1.6843154  | -2.7477763 | 0.2259246  |
| O  | 2.0758955  | -0.1945319 | 3.1200122  |
| O  | 0.2751060  | -2.1503944 | 2.4769444  |
| O  | 3.4785792  | -0.7870413 | 0.8478299  |
| C  | 1.7739217  | -1.1855579 | 4.1178507  |
| C  | 3.0753724  | -3.1068735 | 0.2541241  |
| C  | 0.7000215  | -3.5119007 | 2.3039194  |
| C  | 0.8027260  | -3.7261575 | 0.8055098  |
| C  | 0.3646685  | -1.6630658 | 3.8273082  |
| C  | 3.4775453  | 0.1308678  | 3.0288932  |
| C  | 3.8392211  | -1.8365445 | -0.0707489 |
| C  | 4.1822358  | -0.8402444 | 2.1009358  |
| H  | 1.8345620  | -0.7423035 | 5.1207084  |
| H  | 2.4914044  | -2.0153653 | 4.0603840  |
| H  | 1.6686698  | -3.6783029 | 2.7949602  |
| H  | 3.2815460  | -3.8833368 | -0.4946406 |
| H  | 3.3507731  | -3.4966591 | 1.2435465  |
| H  | 1.1434349  | -4.7426219 | 0.5769976  |
| H  | -0.3352190 | -0.8251226 | 3.8814850  |

|          |                          |            |            |          |                          |            |            |
|----------|--------------------------|------------|------------|----------|--------------------------|------------|------------|
| H        | -0.1691130               | -3.5579973 | 0.3363759  | H        | 3.0205925                | -0.0255108 | 1.8551659  |
| H        | 4.1620140                | -1.8607590 | 2.5073456  | H        | -3.0582811               | 3.2406574  | -0.0728955 |
| H        | -0.0360468               | -4.1974241 | 2.7449604  | H        | -3.0682229               | 0.4642253  | -4.3135612 |
| H        | 0.0577233                | -2.4358430 | 4.5419431  | H        | 3.0983180                | -4.0201633 | 2.5506096  |
| H        | 3.5514472                | -1.4695840 | -1.0582053 | H        | 3.1349133                | 2.0445675  | 3.7966799  |
| H        | 3.9416055                | 0.1232256  | 4.0220418  | H        | 3.1471472                | -2.4170973 | -0.4855452 |
| H        | 3.5193065                | 1.1406748  | 2.6191171  | H        | -3.2416746               | -1.8331466 | -1.2865852 |
| H        | 4.9208197                | -2.0143907 | -0.0504288 | H        | -3.6264690               | -1.1929592 | -4.0878920 |
| H        | 5.2300965                | -0.5446130 | 1.9574062  | H        | -3.8376044               | 2.3061789  | -2.7259774 |
| 72       |                          |            |            | H        | -3.8341250               | 1.1429117  | 0.8684431  |
| <b>5</b> | Energy = -2418.519221492 |            |            | H        | -3.8622120               | -0.3700967 | -0.0393867 |
| W        | 3.1226748                | 1.2422972  | -1.4698775 | H        | 4.1038617                | -2.5673834 | 2.4362614  |
| P        | 1.3644752                | 0.5761503  | 0.2653224  | H        | -4.8591150               | -0.5003579 | -2.0132006 |
| O        | 0.0747213                | -0.1331655 | -0.1615651 | H        | -4.9270547               | 1.9307237  | -1.3917596 |
| H        | -0.9870727               | 0.3624260  | -1.1589750 | H        | -5.3576568               | 0.4761246  | -3.3851779 |
| N        | -1.7890151               | 0.6297277  | -1.8408269 | 55       |                          |            |            |
| H        | -1.3975722               | 1.3368835  | -2.4726730 | <b>6</b> | Energy = -2417.906906436 |            |            |
| F        | 0.8338086                | 2.0282341  | 0.8424820  | P        | -0.7812401               | -0.1742970 | -0.5566278 |
| O        | 0.5896535                | 2.6053213  | -2.8863048 | O        | -0.5559944               | 1.0724838  | 0.4124519  |
| O        | 2.7049697                | -1.3242888 | -3.3543644 | C        | -4.5826376               | -2.6539723 | -0.6523582 |
| O        | 3.6758952                | 3.8198320  | 0.3764770  | W        | -2.8868143               | -1.5373556 | -0.5250944 |
| O        | 5.2301949                | 2.3538868  | -3.5897498 | C        | -1.8206595               | -3.2011855 | 0.0417426  |
| O        | 5.3214930                | -0.4258769 | 0.1783101  | C        | -3.9210218               | 0.1424273  | -1.1179103 |
| Si       | 1.2181835                | 0.5028591  | 3.3980081  | C        | -2.4506946               | -1.9659605 | -2.4930493 |
| Si       | 1.7943872                | -2.1315160 | 1.6088060  | C        | -3.3087777               | -1.1407418 | 1.4531648  |
| C        | 0.0710834                | -2.7240335 | 2.0810755  | O        | -1.2155357               | -4.1387355 | 0.3471505  |
| C        | -0.6518625               | 0.6976996  | 3.3108751  | O        | -2.2002335               | -2.2142087 | -3.5931253 |
| C        | -0.8637434               | -0.7871982 | -3.5824504 | O        | -4.5053056               | 1.0796881  | -1.4602452 |
| C        | 1.5354388                | 2.1469098  | -2.3878433 | O        | -3.5683439               | -0.9506337 | 2.5627604  |
| C        | 1.6258400                | -0.5950333 | 4.8794455  | O        | -5.5492426               | -3.2873083 | -0.7383848 |
| C        | 1.9413516                | -0.2345132 | 1.7911109  | F        | -0.7472535               | 0.5880535  | -1.9915348 |
| C        | 2.0463898                | 2.1640360  | 3.7258053  | C        | 0.8041232                | -1.0122850 | -0.4772865 |
| C        | -2.1041748               | -0.5958600 | -2.7046836 | Si       | 2.1287717                | -0.3468411 | -1.7021697 |
| C        | 2.1482875                | -2.7132034 | -0.1482003 | Si       | 1.4073703                | -1.2332009 | 1.3392428  |
| C        | -2.2898052               | -1.8327101 | -1.8190518 | H        | 0.5901134                | -2.0357157 | -0.8237134 |
| C        | -2.3024392               | 2.6722000  | -0.6217370 | C        | 3.7859194                | -1.1811909 | -1.3736943 |
| C        | 2.8314346                | -0.4095917 | -2.6542436 | C        | 1.6229432                | -0.8330328 | -3.4488275 |
| C        | -2.9007067               | 1.3275631  | -1.0502252 | C        | 2.3189926                | 1.5171580  | -1.5478013 |
| C        | 3.1048181                | -2.9334327 | 2.7037872  | C        | 2.3444681                | -2.8626672 | 1.4077842  |
| C        | -3.2554830               | 0.5059777  | 0.1934785  | C        | 2.4953992                | 0.2033720  | 1.8733000  |
| C        | -3.3424134               | -0.2802855 | -3.5534295 | C        | -0.0123208               | -1.3521699 | 2.5707826  |
| C        | 3.4679580                | 2.8946583  | -0.2849632 | H        | 2.7993715                | 0.0523692  | 2.9166537  |
| C        | -4.0980060               | 1.5349231  | -1.9878816 | H        | 3.4049429                | 0.3023458  | 1.2732675  |
| C        | 4.4664864                | 1.9360064  | -2.8183254 | H        | 1.9458291                | 1.1478364  | 1.8179668  |
| C        | -4.5124714               | 0.2579758  | -2.7247132 | H        | 2.6672519                | -3.0585325 | 2.4378549  |
| C        | 4.5476504                | 0.1884097  | -0.4263330 | H        | 1.6978614                | -3.6924465 | 1.0984696  |
| H        | 0.0146829                | -0.9919207 | -2.9650863 | H        | 3.2330662                | -2.8694151 | 0.7702661  |
| H        | -0.0129129               | -3.8048002 | 1.9114091  | H        | 0.4177600                | -1.5109800 | 3.5683089  |
| H        | -0.1701855               | -2.5318543 | 3.1319566  | H        | -0.6129204               | -0.4393786 | 2.6097925  |
| H        | -0.6699031               | 0.1001383  | -4.1958527 | H        | -0.6792072               | -2.1947962 | 2.3657188  |
| H        | -0.6750686               | -2.2185131 | 1.4590008  | H        | 2.4185707                | -0.5636199 | -4.1547260 |
| H        | -0.9412756               | 1.4232574  | 2.5458861  | H        | 1.4719968                | -1.9173297 | -3.5193419 |
| H        | -1.0217928               | -1.6355340 | -4.2536303 | H        | 0.7009205                | -0.3406296 | -3.7692587 |
| H        | -1.0309436               | 1.0487959  | 4.2790488  | H        | 4.5035831                | -0.8242885 | -2.1237793 |
| H        | 1.1570082                | -1.5829373 | 4.8242755  | H        | 4.2028285                | -0.9608635 | -0.3864566 |
| H        | -1.1459424               | -0.2519488 | 3.0810829  | H        | 3.7127351                | -2.2695205 | -1.4794702 |
| H        | 1.2576261                | -0.1036651 | 5.7897359  | H        | 3.1231300                | 1.8583471  | -2.2114078 |
| H        | 1.4154916                | -2.3224800 | -0.8589702 | H        | 1.4011386                | 2.0387318  | -1.8348905 |
| H        | -1.4337666               | 2.5278200  | 0.0264933  | H        | 2.5772842                | 1.8171740  | -0.5274079 |
| H        | -1.4760430               | -1.9095034 | -1.0929335 | Si       | -1.2121782               | 2.6037685  | 0.7538755  |
| H        | 1.6967251                | 2.5819815  | 4.6784111  | C        | -2.7407553               | 2.3809791  | 1.8041995  |
| H        | 1.8366384                | 2.8877185  | 2.9333804  | H        | -3.5440224               | 1.8721954  | 1.2622679  |
| H        | -1.9991299               | 3.2638820  | -1.4930675 | H        | -2.5229800               | 1.8066096  | 2.7110596  |
| H        | 2.1027348                | -3.8099372 | -0.1747308 | H        | -3.1195322               | 3.3636090  | 2.1121118  |
| H        | -2.2672672               | -2.7162719 | -2.4633255 | C        | 0.1399382                | 3.4732297  | 1.7039286  |
| H        | -2.3486879               | 0.1839395  | 0.7116516  | H        | -0.1782828               | 4.4887380  | 1.9694218  |
| H        | 2.7065881                | -0.7364527 | 4.9938421  | H        | 0.3777878                | 2.9439325  | 2.6335521  |
| H        | 2.9505766                | -2.7436571 | 3.7696782  | H        | 1.0563011                | 3.5531001  | 1.1084309  |

|              |                          |            |            |           |                          |            |            |
|--------------|--------------------------|------------|------------|-----------|--------------------------|------------|------------|
| C            | -1.5970519               | 3.4708862  | -0.8554517 | H         | -0.6878994               | -1.3813748 | 3.4925968  |
| H            | -1.9811625               | 4.4773815  | -0.6480071 | H         | -3.0641035               | -0.1478793 | 1.7481845  |
| H            | -0.7010308               | 3.5728072  | -1.4770531 | H         | -0.7126386               | 0.0921526  | 4.4697513  |
| H            | -2.3551998               | 2.9360792  | -1.4364526 | H         | -0.5206279               | -2.1752905 | -2.1432231 |
|              |                          |            |            | H         | -0.3338702               | 2.7898201  | 3.4084415  |
| 30           |                          |            |            | H         | -0.2725148               | 3.1584722  | 1.6742956  |
| <b>7HmS-</b> | Energy = -1599.802233431 |            |            | H         | 0.2881018                | -3.5838457 | -1.4435295 |
| W            | 0.3841347                | 3.1192575  | -0.1352590 | H         | 0.7927812                | -0.4242926 | 3.6973479  |
| Si           | -0.4058853               | -2.3004080 | 0.0920609  | H         | 1.2404656                | -2.3621078 | 2.4302728  |
| P            | 0.8220057                | 0.5992533  | 0.1051727  | H         | 1.1217830                | 0.2413734  | 0.5987010  |
| O            | 3.0612993                | 3.2910470  | -1.9078741 | H         | 1.3800284                | -3.6872956 | 1.2637386  |
| O            | 2.1703257                | 3.4716420  | 2.5158208  | H         | 1.0990111                | 2.3587050  | 2.4633295  |
| O            | -1.3062655               | 2.4247163  | -2.7755191 | H         | 1.2312535                | -2.1513145 | -1.8593626 |
| O            | -2.2184084               | 2.6403190  | 1.6859619  | H         | 2.3239505                | -2.2068682 | 1.0360661  |
| O            | -0.1751122               | 6.2468166  | -0.3972530 |           |                          |            |            |
| F            | 1.7519405                | 0.1400183  | -1.1794254 | 42        |                          |            |            |
| C            | 1.2359354                | -2.9522463 | -0.5578045 | <b>7-</b> | Energy = -2008.600899941 |            |            |
| C            | -0.5084178               | -2.5595812 | 1.9530768  | W         | 0.1474755                | 3.3964973  | -0.1848825 |
| C            | 2.0938188                | 3.2409083  | -1.2716490 | Si        | -0.1842520               | -1.6815921 | -1.4829087 |
| C            | 1.5225804                | 3.3594649  | 1.5628515  | Si        | -0.0606190               | -0.9416872 | 1.6487990  |
| C            | -1.8163700               | -3.2340593 | -0.7529841 | P         | 1.0631796                | 1.0009318  | -0.4188365 |
| C            | -0.7001858               | 2.6923764  | -1.8221625 | O         | 2.3651336                | 0.5915106  | 0.2285177  |
| C            | -1.2813109               | 2.8284616  | 1.0267219  | O         | 2.7147180                | 4.2331083  | -1.9333836 |
| C            | 0.0311520                | 5.1020169  | -0.2979345 | O         | 1.9100996                | 3.6924551  | 2.4873314  |
| H            | 1.3223711                | -4.0307598 | -0.3733530 | O         | -1.4991657               | 2.7956957  | -2.8773325 |
| H            | 1.3349795                | -2.7814926 | -1.6360681 | O         | -2.3985268               | 2.3774442  | 1.4844173  |
| H            | 2.0685953                | -2.4447664 | -0.0600723 | O         | -0.8772113               | 6.4092130  | -0.0301841 |
| H            | 0.2897771                | -1.9891271 | 2.4394501  | F         | 1.3121228                | 0.8530052  | -2.0531276 |
| H            | -0.3987468               | -3.6193905 | 2.2155587  | C         | 1.5495229                | -2.3241879 | -1.8399083 |
| H            | -1.7611172               | -4.3090194 | -0.5377705 | C         | 1.2299235                | -2.3047351 | 1.8116156  |
| H            | -1.4697739               | -2.2111507 | 2.3508463  | C         | 0.4068788                | 0.4066183  | 2.8813321  |
| H            | -1.7773864               | -3.1079677 | -1.8422046 | C         | -0.9776349               | -1.0104707 | -3.0580444 |
| H            | -2.7937702               | -2.8732505 | -0.4091527 | C         | 1.7893715                | 3.9382692  | -1.3014614 |
| O            | 1.4978805                | 0.0855665  | 1.3548208  | C         | -0.1844238               | -0.3243945 | -0.1497412 |
| C            | -0.6243794               | -0.4561368 | -0.2941612 | C         | -1.2551215               | -3.1530967 | -0.9619826 |
| H            | -0.8814716               | -0.2974372 | -1.3497113 | C         | 1.2663634                | 3.5902190  | 1.5295807  |
| H            | -1.4681946               | -0.0750713 | 0.2980165  | C         | -1.7631206               | -1.5727300 | 2.1755774  |
|              |                          |            |            | C         | -0.9059875               | 3.0273192  | -1.9081520 |
| 43           |                          |            |            | C         | -1.4690393               | 2.7470712  | 0.8935257  |
| <b>7H</b>    | Energy = -2009.065211705 |            |            | C         | -0.5038009               | 5.3040801  | -0.0801552 |
| W            | 1.2620723                | 1.4323703  | -2.7804864 | H         | 1.3326430                | -2.6006287 | 2.8635145  |
| P            | -0.4126537               | 0.8743925  | -1.0165124 | H         | 0.9819944                | -3.2016458 | 1.2341227  |
| O            | -1.7784468               | 0.0817116  | -1.4038911 | H         | 1.9923381                | -2.7931256 | -0.9550296 |
| H            | -2.0705831               | 0.2617005  | -2.3142296 | H         | 2.1970982                | -1.9262941 | 1.4629146  |
| F            | -1.0562347               | 2.2726757  | -0.5003477 | H         | 1.5103944                | -3.0771589 | -2.6378374 |
| O            | -0.9213869               | 3.4028272  | -4.0853823 | H         | 2.2122174                | -1.5143524 | -2.1578432 |
| O            | 0.2573326                | -0.9399036 | -4.7057159 | H         | 1.3981977                | 0.8116893  | 2.6625060  |
| O            | 2.2182978                | 3.8100714  | -0.8358196 | H         | -1.0503838               | -1.8030381 | -3.8141158 |
| O            | 3.4180445                | 2.3027267  | -4.9727866 | H         | -0.4049964               | -0.1799303 | -3.4790456 |
| O            | 3.4259783                | -0.4826977 | -1.3750935 | H         | 0.4229005                | -0.0310030 | 3.8888386  |
| Si           | -0.7478025               | 0.7278979  | 2.0973838  | H         | -1.2743300               | -3.8837637 | -1.7817752 |
| Si           | -0.0328839               | -1.8973921 | 0.3058601  | H         | -0.8772519               | -3.6650330 | -0.0707798 |
| C            | -1.7135812               | -2.5510809 | 0.8342832  | H         | -1.7378682               | -1.8873725 | 3.2269576  |
| C            | -2.6167621               | 0.8320893  | 1.9422646  | H         | -0.3091680               | 1.2340923  | 2.8921545  |
| C            | -0.1388158               | 2.6919836  | -3.6198596 | H         | -1.9939792               | -0.6504608 | -2.8545276 |
| C            | -0.2930846               | -0.3634832 | 3.5633985  | H         | -2.1079761               | -2.4220827 | 1.5782162  |
| C            | 0.0477244                | 0.0227992  | 0.4891215  | H         | -1.1690273               | 0.1610321  | -0.2406872 |
| C            | 0.0042693                | 2.4205573  | 2.4321379  | H         | -2.2898849               | -2.8488470 | -0.7650853 |
| C            | 0.2710797                | -2.4860494 | -1.4564381 | H         | -2.5088036               | -0.7726214 | 2.0869058  |
| C            | 0.6192356                | -0.0946479 | -4.0058902 |           |                          |            |            |
| C            | 1.3536235                | -2.5955397 | 1.3681059  | 42        |                          |            |            |
| C            | 1.8775634                | 2.9590926  | -1.5380263 | <b>7</b>  | Energy = -2008.420936424 |            |            |
| C            | 2.6377589                | 1.19827839 | -4.1794631 | W         | 0.3156157                | 3.4073161  | -0.0939662 |
| C            | 2.6457277                | 0.1966850  | -1.8917433 | Si        | -0.2622408               | -1.7722966 | -1.5140023 |
| H            | -1.7319532               | -3.6399419 | 0.7002556  | Si        | -0.0513875               | -0.9543411 | 1.6439651  |
| H            | -1.9488487               | -2.3419892 | 1.8823384  | P         | 0.8792098                | 0.9746994  | -0.5649694 |
| H            | -2.5056071               | -2.1211883 | 0.2119569  | O         | 2.2186186                | 0.8749672  | 0.1388929  |
| H            | -2.9183753               | 1.5082242  | 1.1366993  | O         | 3.0396331                | 4.3189279  | -1.5621962 |
| H            | -3.0374092               | 1.2130708  | 2.8812697  | O         | 1.6324614                | 3.9256665  | 2.8151527  |

|                        |                          |            |            |                                    |                          |            |            |
|------------------------|--------------------------|------------|------------|------------------------------------|--------------------------|------------|------------|
| O                      | -1.0052998               | 3.1077096  | -3.0153572 | H                                  | 4.1201774                | -1.8002704 | 1.1785065  |
| O                      | -2.3463385               | 2.3042961  | 1.3169407  | H                                  | 4.1201774                | 1.8002704  | -1.1785065 |
| O                      | -1.0604092               | 6.2797233  | -0.1836561 | H                                  | 5.3749921                | 0.0000000  | 0.0000000  |
| F                      | 1.1421892                | 0.8174368  | -2.1542398 |                                    |                          |            |            |
| C                      | 1.4837669                | -2.3450292 | -1.9018398 | 34                                 |                          |            |            |
| C                      | 1.2981985                | -2.2563868 | 1.7499843  | <b>CPh<sub>3</sub><sup>+</sup></b> | Energy = -733.3236327450 |            |            |
| C                      | 0.4117068                | 0.4349096  | 2.8258337  | C                                  | 0.0004526                | -0.0002639 | 0.0000421  |
| C                      | -1.1314366               | -1.1216219 | -3.0503980 | C                                  | -0.7212253               | 1.2378460  | -0.1701043 |
| C                      | 2.0703194                | 4.0001517  | -1.0317273 | C                                  | -0.7213720               | -1.2378155 | 0.1724051  |
| C                      | -0.2563433               | -0.3722085 | -0.1848093 | C                                  | -0.1892361               | 2.4554871  | 0.3237376  |
| C                      | -1.2758102               | -3.2308075 | -0.8877341 | C                                  | -0.1918586               | -2.4557876 | -0.3234131 |
| C                      | 1.1725012                | 3.7145316  | 1.7835704  | C                                  | -1.9715086               | -1.2547784 | 0.8406351  |
| C                      | -1.7237039               | -1.6139715 | 2.1993786  | C                                  | -1.9735861               | 1.2554762  | -0.8340486 |
| C                      | -0.5319932               | 3.2044484  | -1.9718150 | C                                  | -0.8934137               | 3.6395163  | 0.1696740  |
| C                      | -1.3843263               | 2.7074063  | 0.8231350  | C                                  | -0.8963068               | -3.6393342 | -0.1672530 |
| C                      | -0.5371379               | 5.2511924  | -0.1309535 | C                                  | 1.4434993                | -0.0004875 | -0.0023082 |
| H                      | 1.4362934                | -2.5503909 | -2.7978002 | C                                  | -2.6542299               | -2.4483034 | 1.0163240  |
| H                      | 1.0704685                | -3.1610173 | 1.1777294  | C                                  | -2.6562300               | 2.4493895  | -1.0074620 |
| H                      | 1.9879591                | -2.7428256 | -1.0154249 | C                                  | -2.1228353               | -3.6392132 | 0.5074914  |
| H                      | 2.2489451                | -1.8496486 | 1.3873140  | C                                  | -2.1221218               | 3.6401033  | -0.5010145 |
| H                      | 1.4411076                | -3.1472768 | -2.6491911 | C                                  | 2.1624095                | 0.9303996  | -0.7937550 |
| H                      | 2.0990349                | -1.5377022 | -2.3103355 | C                                  | 2.1648709                | -0.9315600 | 0.7866452  |
| H                      | 1.3780359                | 0.8776108  | 2.5720893  | C                                  | 3.5509818                | -0.9178591 | 0.7917731  |
| H                      | -1.2542808               | -1.9338248 | -3.7777256 | C                                  | 3.5485258                | 0.9170556  | -0.8028239 |
| H                      | -0.5770591               | -0.3131182 | -3.5346698 | C                                  | 4.2441687                | -0.0002690 | -0.0064680 |
| H                      | 0.4883853                | 0.0049086  | 3.8332308  | H                                  | 0.7448582                | 2.4423246  | 0.8749288  |
| H                      | -1.3134424               | -3.9824748 | -1.6869770 | H                                  | 0.7403640                | -2.4432286 | -0.8777902 |
| H                      | -0.8475639               | -3.7106561 | -0.0025414 | H                                  | -2.3596948               | -0.3351264 | 1.2649235  |
| H                      | -1.6684323               | -1.8923663 | 3.2591856  | H                                  | -2.3636181               | 0.3360092  | -1.2570574 |
| H                      | -0.3410721               | 1.2276082  | 2.8706939  | H                                  | 1.6223024                | -1.6147408 | 1.4311534  |
| H                      | -2.1320578               | -0.7486337 | -2.7998073 | H                                  | 1.6177845                | 1.6132144  | -1.4368892 |
| H                      | -2.0528269               | -2.4918602 | 1.6377468  | H                                  | -0.4956916               | 4.5631123  | 0.5770519  |
| H                      | -1.2616179               | 0.0725723  | -0.2510338 | H                                  | -0.5005339               | -4.5631426 | -0.5760364 |
| H                      | -2.3065893               | -2.9392191 | -0.6582813 | H                                  | -3.5953543               | -2.4595437 | 1.5561036  |
| H                      | -2.4930806               | -0.8384291 | 2.1010083  | H                                  | -3.5995737               | 2.4610229  | -1.5433505 |
|                        |                          |            |            | H                                  | -2.6651766               | 4.5714211  | -0.6294485 |
| 34                     |                          |            |            | H                                  | -2.6664064               | -4.5700876 | 0.6369560  |
| <b>CPh<sub>3</sub></b> | Energy = -733.4910462718 |            |            | H                                  | 4.0971523                | -1.6122549 | 1.4216151  |
| C                      | 0.0000000                | 0.0000000  | 0.0000000  | H                                  | 4.0927213                | 1.6114397  | -1.4343829 |
| C                      | -0.7286857               | 1.2621206  | 0.0000000  | H                                  | 5.3298824                | -0.0000213 | -0.0078541 |
| C                      | -0.7286857               | -1.2621206 | 0.0000000  |                                    |                          |            |            |
| C                      | -0.2144845               | 2.4072908  | 0.6529237  | 14                                 |                          |            |            |
| C                      | -0.2144845               | -2.4072908 | -0.6529237 | <b>PhCH<sub>2</sub></b>            | Energy = -271.0826274800 |            |            |
| C                      | -1.9775327               | -1.3893945 | 0.6529237  | C                                  | 2.3234141                | -0.1563782 | 0.0000000  |
| C                      | -1.9775327               | 1.3893945  | -0.6529237 | C                                  | -1.2040812               | 0.0785913  | -1.2134115 |
| C                      | -0.9130012               | 3.6094877  | 0.6554034  | C                                  | 0.1788362                | -0.0134144 | -1.2186078 |
| C                      | -0.9130012               | -3.6094877 | -0.6554034 | C                                  | 0.9190479                | -0.0627327 | 0.0000000  |
| C                      | 1.4573713                | 0.0000000  | 0.0000000  | C                                  | 0.1788362                | -0.0134144 | 1.2186078  |
| C                      | -2.6694074               | -2.5954261 | 0.6554034  | C                                  | -1.2040812               | 0.0785913  | 1.2134115  |
| C                      | -2.6694074               | 2.5954261  | -0.6554034 | C                                  | -1.9083706               | 0.1253956  | 0.0000000  |
| C                      | -2.1444033               | -3.7142154 | 0.0000000  | H                                  | 2.8803185                | -0.1938299 | 0.9313088  |
| C                      | -2.1444033               | 3.7142154  | 0.0000000  | H                                  | 2.8803185                | -0.1938299 | -0.9313088 |
| C                      | 2.1920173                | 1.0178964  | -0.6529237 | H                                  | -1.7462783               | 0.1148585  | -2.1544880 |
| C                      | 2.1920173                | -1.0178964 | 0.6529237  | H                                  | 0.7203521                | -0.0492050 | -2.1608534 |
| C                      | 3.5824086                | -1.0140616 | 0.6554034  | H                                  | 0.7203521                | -0.0492050 | 2.1608534  |
| C                      | 3.5824086                | 1.0140616  | -0.6554034 | H                                  | -1.7462783               | 0.1148585  | 2.1544880  |
| C                      | 4.2888065                | 0.0000000  | 0.0000000  | H                                  | -2.9919983               | 0.1978672  | 0.0000000  |
| H                      | 0.7312956                | 2.3328645  | 1.1810619  |                                    |                          |            |            |
| H                      | 0.7312956                | -2.3328645 | -1.1810619 | 15                                 |                          |            |            |
| H                      | -2.3859677               | -0.5331117 | 1.1810619  | <b>PhCH<sub>3</sub></b>            | Energy = -271.7322720111 |            |            |
| H                      | -2.3859677               | 0.5331117  | -1.1810619 | C                                  | 2.2326809                | -0.0029986 | 0.0000000  |
| H                      | 1.6546721                | -1.7997528 | 1.1810619  | H                                  | 2.6100031                | 1.0277623  | 0.0000000  |
| H                      | 1.6546721                | 1.7997528  | -1.1810619 | C                                  | -1.3928032               | 0.0029447  | -1.2066979 |
| H                      | -0.5010088               | 4.4683135  | 1.1785065  | C                                  | 0.0031787                | -0.0136599 | -1.2021841 |
| H                      | -0.5010088               | -4.4683135 | -1.1785065 | C                                  | 0.7230344                | -0.0183818 | 0.0000000  |
| H                      | -3.6191686               | -2.6680431 | 1.1785065  | C                                  | 0.0031787                | -0.0136599 | 1.2021841  |
| H                      | -3.6191686               | 2.6680431  | -1.1785065 | C                                  | -1.3928032               | 0.0029447  | 1.2066979  |
| H                      | -2.6874960               | 4.6548797  | 0.0000000  | C                                  | -2.0968501               | 0.0127151  | 0.0000000  |
| H                      | -2.6874960               | -4.6548797 | 0.0000000  | H                                  | 2.6336484                | -0.4998771 | 0.8888229  |

|   |            |            |            |
|---|------------|------------|------------|
| H | 2.6336484  | -0.4998771 | -0.8888229 |
| H | -1.9300969 | 0.0043613  | -2.1513804 |
| H | 0.5434870  | -0.0257715 | -2.1464944 |
| H | 0.5434870  | -0.0257715 | 2.1464944  |
| H | -1.9300969 | 0.0043613  | 2.1513804  |
| H | -3.1833085 | 0.0230609  | 0.0000000  |

30

**TEMPh<sub>2</sub><sup>+</sup>** Energy = -409.8689320610

|   |            |            |            |
|---|------------|------------|------------|
| N | 0.9373346  | 0.1605298  | 0.0000000  |
| H | 1.7420319  | -0.4760162 | 0.0000000  |
| H | 1.3332529  | 1.1072367  | 0.0000000  |
| C | -1.1047550 | 0.8083578  | 1.2567865  |
| C | 0.1955159  | 0.0005834  | 1.3516470  |
| C | -1.9214448 | 0.4969618  | 0.0000000  |
| C | -0.0402598 | -1.4817774 | 1.6431454  |
| C | 0.1955159  | 0.0005834  | -1.3516470 |
| C | -0.0402598 | -1.4817774 | -1.6431454 |
| C | 1.1487817  | 0.5957925  | -2.3917870 |
| C | -1.1047550 | 0.8083578  | -1.2567865 |
| C | 1.1487817  | 0.5957925  | 2.3917870  |
| H | -0.8197339 | -1.9190692 | 1.0193342  |
| H | -0.8594688 | 1.8784975  | 1.2728019  |
| H | -1.6849803 | 0.5996144  | 2.1600969  |
| H | 0.8800145  | -2.0623081 | -1.5191628 |
| H | -2.2501543 | -0.5484555 | 0.0000000  |
| H | 1.3666687  | 1.6468543  | -2.1724664 |
| H | 2.0897425  | 0.0366811  | -2.4347297 |
| H | -0.8197339 | -1.9190692 | -1.0193342 |
| H | -2.8285977 | 1.1082054  | 0.0000000  |
| H | 0.8800145  | -2.0623081 | 1.5191628  |
| H | -0.8594688 | 1.8784975  | -1.2728019 |
| H | -0.3563254 | -1.5728771 | 2.6859917  |
| H | 1.3666687  | 1.6468543  | 2.1724664  |
| H | -0.3563254 | -1.5728771 | -2.6859917 |
| H | 0.6785885  | 0.5454197  | -3.3772151 |
| H | 0.6785885  | 0.5454197  | 3.3772151  |
| H | -1.6849803 | 0.5996144  | -2.1600969 |
| H | 2.0897425  | 0.0366811  | 2.4347297  |

30

**TEMPOH** Energy = -484.6278629345

|   |            |            |            |
|---|------------|------------|------------|
| N | 0.8683398  | 0.3024933  | 0.0000000  |
| C | -1.1509630 | 0.8387399  | 1.2497524  |
| C | 0.1659132  | 0.0383992  | 1.2897433  |
| C | -1.9824767 | 0.5494297  | 0.0000000  |
| C | -0.0995194 | -1.4479834 | 1.6073515  |
| C | 0.1659132  | 0.0383992  | -1.2897433 |
| C | -0.0995194 | -1.4479834 | -1.6073515 |
| C | 1.0647163  | 0.6199456  | -2.3929352 |
| C | -1.1509630 | 0.8387399  | -1.2497524 |
| C | 1.0647163  | 0.6199456  | 2.3929352  |
| H | -0.9277142 | -1.8598258 | 1.0274545  |
| H | -0.9099483 | 1.9091190  | 1.2836734  |
| H | -1.7149662 | 0.6055665  | 2.1606395  |
| H | 0.7968590  | -2.0418073 | -1.4099195 |
| H | -2.3198956 | -0.4944789 | 0.0000000  |
| H | 1.3457360  | 1.6482803  | -2.1417535 |
| H | 1.9748795  | 0.0242996  | -2.5082594 |
| H | -0.9277142 | -1.8598258 | -1.0274545 |
| H | -2.8868057 | 1.1692356  | 0.0000000  |
| H | 0.7968590  | -2.0418073 | 1.4099195  |
| H | -0.9099483 | 1.9091190  | -1.2836734 |
| H | -0.3536191 | -1.5481788 | 2.6686218  |
| H | 1.3457360  | 1.6482803  | 2.1417535  |
| H | -0.3536191 | -1.5481788 | -2.6686218 |
| H | 0.5291920  | 0.6201107  | -3.3486395 |
| H | 0.5291920  | 0.6201107  | 3.3486395  |
| H | -1.7149662 | 0.6055665  | -2.1606395 |

|   |           |            |           |
|---|-----------|------------|-----------|
| H | 1.9748795 | 0.0242996  | 2.5082594 |
| O | 2.0931289 | -0.5096285 | 0.0000000 |
| H | 2.7865777 | 0.1696175  | 0.0000000 |

29

**TEMPO-** Energy = -484.0919124136

|   |            |            |            |
|---|------------|------------|------------|
| N | 0.8799050  | 0.5735637  | -0.0076164 |
| C | -1.2587336 | 0.5182788  | 1.2439643  |
| C | 0.2300540  | 0.1306509  | 1.2683723  |
| C | -1.9817682 | -0.0139085 | 0.0075258  |
| C | 0.4239163  | -1.3698652 | 1.5770861  |
| C | 0.2202509  | 0.1124720  | -1.2719487 |
| C | 0.4108449  | -1.3927053 | -1.5593315 |
| C | 0.9086713  | 0.9022932  | -2.3948451 |
| C | -1.2679773 | 0.5014167  | -1.2413006 |
| C | 0.9274839  | 0.9371114  | 2.3734968  |
| O | 2.2374105  | 0.1454257  | -0.0098544 |
| H | -1.3263374 | 1.6160900  | 1.2445537  |
| H | -1.7357087 | 0.1610525  | 2.1673348  |
| H | -1.9876878 | -1.1118493 | 0.0149668  |
| H | -3.0327092 | 0.3052698  | 0.0091857  |
| H | -0.3100469 | -2.0032594 | 1.0699311  |
| H | 1.4313324  | -1.6267513 | 1.2275433  |
| H | 0.3496488  | -1.5616219 | 2.6551464  |
| H | 1.4209583  | -1.6450327 | -1.2141840 |
| H | -0.3191905 | -2.0176687 | -1.0363040 |
| H | 0.3274676  | -1.6010862 | -2.6336375 |
| H | 0.8013431  | 1.9757930  | -2.2016988 |
| H | 1.9735219  | 0.6548318  | -2.4020283 |
| H | 0.4629224  | 0.6652453  | -3.3698340 |
| H | -1.3343719 | 1.5990860  | -1.2553510 |
| H | -1.7522988 | 0.1328757  | -2.1563647 |
| H | 0.8226858  | 2.0070061  | 2.1615942  |
| H | 0.4868368  | 0.7188416  | 3.3551464  |
| H | 1.9915762  | 0.6864446  | 2.3784514  |

29

**TEMPO** Energy = -484.0199169843

|   |            |            |            |
|---|------------|------------|------------|
| N | 0.9404027  | -0.1237507 | 0.0000000  |
| C | -0.9217772 | 0.9764852  | 1.2414248  |
| C | 0.2437423  | -0.0223963 | 1.3309191  |
| C | -1.7882260 | 0.7783737  | 0.0000000  |
| C | -0.2455350 | -1.4234679 | 1.7464627  |
| C | 0.2437423  | -0.0223963 | -1.3309191 |
| C | -0.2455350 | -1.4234679 | -1.7464627 |
| C | 1.2777601  | 0.4804312  | -2.3465278 |
| C | -0.9217772 | 0.9764852  | -1.2414248 |
| C | 1.2777601  | 0.4804312  | 2.3465278  |
| O | 2.0689367  | -0.7479501 | 0.0000000  |
| H | -0.5122153 | 1.9952907  | 1.2272882  |
| H | -1.5139009 | 0.8788519  | 2.1583952  |
| H | -2.2451356 | -0.2187836 | 0.0000000  |
| H | -2.6109307 | 1.5018489  | 0.0000000  |
| H | -1.0838014 | -1.7633473 | 1.1328670  |
| H | 0.5742498  | -2.1412515 | 1.6533363  |
| H | -0.5751787 | -1.3965102 | 2.7902466  |
| H | 0.5742498  | -2.1412515 | -1.6533363 |
| H | -1.0838014 | -1.7633473 | -1.1328670 |
| H | -0.5751787 | -1.3965102 | -2.7902466 |
| H | 1.6891081  | 1.4435854  | -2.0279619 |
| H | 2.0960055  | -0.2342538 | -2.4549917 |
| H | 0.7886410  | 0.6124826  | -3.3171554 |
| H | -0.5122153 | 1.9952907  | -1.2272882 |
| H | -1.5139009 | 0.8788519  | -2.1583952 |
| H | 1.6891081  | 1.4435854  | 2.0279619  |
| H | 0.7886410  | 0.6124826  | 3.3171554  |
| H | 2.0960055  | -0.2342538 | 2.4549917  |

29

**TEMPO+** Energy = -483.8301174894

|   |            |            |            |              |                          |            |            |
|---|------------|------------|------------|--------------|--------------------------|------------|------------|
| N | 0.8796876  | 0.4263857  | -0.0065854 | C            | -0.9516319               | 0.7851594  | 0.4365426  |
| C | -1.2515401 | 0.5132242  | 1.2503021  | C            | -1.4491380               | 1.4517677  | -0.8739174 |
| C | 0.2432049  | 0.1054984  | 1.3427946  | C            | -1.3874981               | 1.6696565  | 1.6183143  |
| C | -1.9527266 | -0.0218493 | 0.0079332  | C            | -1.5719916               | -0.6229208 | 0.5857510  |
| C | 0.4114530  | -1.4109780 | 1.6063621  | C            | 2.6292730                | -0.3043092 | 0.5716778  |
| C | 0.2324912  | 0.0859107  | -1.3460435 | H            | 0.5919294                | -0.1131901 | -2.2317877 |
| C | 0.3984967  | -1.4342509 | -1.5890229 | H            | 0.7113355                | -2.0115814 | 1.0649008  |
| C | 0.9633556  | 0.8709226  | -2.4276128 | H            | 1.1310021                | -2.4131964 | -0.6018445 |
| C | -1.2614329 | 0.4953336  | -1.2474853 | H            | -0.9281454               | 2.3995549  | -1.0375777 |
| C | 0.9824878  | 0.9062455  | 2.4069622  | H            | -1.0439909               | -1.3962791 | -1.3734845 |
| O | 1.9215405  | 1.0216338  | -0.0150688 | H            | -1.0067366               | 1.2586848  | 2.5591765  |
| H | -1.3069835 | 1.6072767  | 1.2699105  | H            | -0.9949858               | 2.6845758  | 1.4984508  |
| H | -1.7168328 | 0.1426253  | 2.1687705  | H            | -1.2861172               | 0.8095759  | -1.7426161 |
| H | -1.9906187 | -1.1159526 | 0.0159017  | H            | -1.3414917               | -2.6412418 | -0.1667468 |
| H | -2.9913864 | 0.3238315  | 0.0096083  | H            | 1.8784522                | 1.0200025  | -1.7688466 |
| H | -0.2648105 | -2.0217533 | 1.0119689  | H            | -1.4617210               | -0.9435420 | 1.6308388  |
| H | 1.4433220  | -1.7278410 | 1.4398806  | H            | 2.2556123                | -0.7006287 | -2.0297201 |
| H | 0.1703520  | -1.5548465 | 2.6627071  | H            | 2.4948200                | -0.4623029 | 1.6469181  |
| H | 1.4315985  | -1.7489459 | -1.4261351 | H            | -2.5230162               | 1.6492924  | -0.7841064 |
| H | -0.2731590 | -2.0362597 | -0.9806096 | H            | 3.2639147                | -1.1066268 | 0.1779150  |
| H | 0.1489901  | -1.5932238 | -2.6412321 | H            | -2.4811696               | 1.7163179  | 1.6751913  |
| H | 0.9574179  | 1.9428917  | -2.2149180 | H            | 3.1360414                | 0.6544398  | 0.4221088  |
| H | 1.9961777  | 0.5355778  | -2.5454166 | H            | -2.6474195               | -0.5560136 | 0.3820308  |
| H | 0.4311946  | 0.6954595  | -3.3658641 |              |                          |            |            |
| H | -1.3168677 | 1.5890436  | -1.2823423 | 12           |                          |            |            |
| H | -1.7341376 | 0.1118438  | -2.1568401 | <b>THFmH</b> | Energy = -231.9373294588 |            |            |
| H | 0.9741481  | 1.9750796  | 2.1790065  | O            | -1.5260503               | -0.2847670 | 0.1020836  |
| H | 0.4581384  | 0.7439843  | 3.3519642  | C            | 0.7012197                | 0.0928374  | 0.8767523  |
| H | 2.0164392  | 0.5731329  | 2.5211039  | C            | 0.6993697                | -0.0841138 | -0.6611464 |

28

**TEMP-** Energy = -408.8380337409

|   |            |            |            |
|---|------------|------------|------------|
| N | 0.9616228  | 0.5461016  | 0.0000000  |
| C | -1.1938458 | 0.4868911  | 1.2666659  |
| C | 0.3240445  | 0.1482019  | 1.2328548  |
| C | -1.9051469 | -0.0059525 | 0.0000000  |
| C | 0.4870202  | -1.3633473 | 1.6240670  |
| C | 0.3240445  | 0.1482019  | -1.2328548 |
| C | 0.4870202  | -1.3633473 | -1.6240670 |
| C | 1.0245349  | 0.9550203  | -2.3407403 |
| C | -1.1938458 | 0.4868911  | -1.2666659 |
| C | 1.0245349  | 0.9550203  | 2.3407403  |
| H | -1.2995612 | 1.5784911  | 1.3471551  |
| H | -1.6758035 | 0.0526533  | 2.1584062  |
| H | -1.9237699 | -1.1057364 | 0.0000000  |
| H | -2.9561784 | 0.3169605  | 0.0000000  |
| H | -0.1701544 | -2.0128125 | 1.0365980  |
| H | 1.5218565  | -1.6646573 | 1.4235312  |
| H | 0.2604947  | -1.5398312 | 2.6877980  |
| H | 1.5218565  | -1.6646573 | -1.4235312 |
| H | -0.1701544 | -2.0128125 | -1.0365980 |
| H | 0.2604947  | -1.5398312 | -2.6877980 |
| H | 0.9800019  | 2.0183199  | -2.0771849 |
| H | 2.0827877  | 0.6659917  | -2.3881582 |
| H | 0.5707361  | 0.7971826  | -3.3301935 |
| H | -1.2995612 | 1.5784911  | -1.3471551 |
| H | -1.6758035 | 0.0526533  | -2.1584062 |
| H | 0.9800019  | 2.0183199  | 2.0771849  |
| H | 0.5707361  | 0.7971826  | 3.3301935  |
| H | 2.0827877  | 0.6659917  | 2.3881582  |

28

**TEMP** Energy = -408.7570106420

|   |            |            |            |
|---|------------|------------|------------|
| N | 0.5114827  | 0.8176486  | 0.4208114  |
| C | 0.5945406  | -1.6877581 | 0.0215153  |
| C | 1.2650138  | -0.3042732 | -0.1408710 |
| C | -0.8943570 | -1.6519113 | -0.3167126 |
| C | 1.5059928  | -0.0009008 | -1.6439118 |

12

**THFmH** Energy = -231.9373294588

|   |            |            |            |
|---|------------|------------|------------|
| O | -1.5260503 | -0.2847670 | 0.1020836  |
| C | 0.7012197  | 0.0928374  | 0.8767523  |
| C | 0.6993697  | -0.0841138 | -0.6611464 |
| C | -0.7513941 | 0.2291042  | -1.0222283 |
| C | -0.7327493 | -0.1809536 | 1.2345245  |
| H | 1.3992304  | -0.5877541 | 1.3776538  |
| H | 0.9345186  | -1.1203444 | -0.9236863 |
| H | 1.0006776  | 1.1165361  | 1.1459847  |
| H | 1.4057145  | 0.5759682  | -1.1705447 |
| H | -0.9300665 | 1.3089568  | -1.1025670 |
| H | -1.1198264 | -0.2728783 | -1.9183513 |
| H | -1.0806439 | -0.7925914 | 2.0615251  |

13

**THF** Energy = -232.5923565762

|   |            |            |            |
|---|------------|------------|------------|
| O | -1.4042011 | -0.4952846 | 0.0000000  |
| C | 0.7948738  | -0.0686383 | 0.7775057  |
| C | 0.7948738  | -0.0686383 | -0.7775057 |
| C | -0.6977077 | 0.0311156  | -1.1400844 |
| C | -0.6977077 | 0.0311156  | 1.1400844  |
| H | 1.2238864  | -0.9972744 | 1.1629451  |
| H | 1.2238864  | -0.9972744 | -1.1629451 |
| H | 1.3642089  | 0.7661878  | 1.1951692  |
| H | 1.3642089  | 0.7661878  | -1.1951692 |
| H | -0.9940700 | 1.0790849  | -1.3026705 |
| H | -0.9940700 | 1.0790849  | 1.3026705  |
| H | -0.9890908 | -0.5628335 | -2.0090793 |
| H | -0.9890908 | -0.5628335 | 2.0090793  |
